1

2 **Experimental sound exposure modifies swimming activities and increases food handling**  
3 **error in zebrafish (*Danio rerio*)**

4

5 Reza Mohsenpour<sup>a</sup>, Saeed Shafiei Sabet<sup>a,\*</sup>

6 <sup>a</sup> Fisheries Department, Faculty of Natural Resources, University of Guilan, Sowmeh Sara,  
7 Iran, P.O. box: 1144

8

9 **Abstract:**

10 Anthropogenic sound is currently recognized as a source of environmental pollution in  
11 terrestrial and aquatic habitats. Elevated sound levels may cause a broad range of impacts on  
12 aquatic organisms among taxa. Sound is an important sensory stimulus for aquatic organisms  
13 and it may cause fluctuations in stress-related physiological indices and in a broader extent  
14 induce behavioural effects such as driving as a distracting stimulus, masking important relevant  
15 acoustic signals and cues in a range of marine and freshwater species. However, sound  
16 exposure may also induce changes in swimming activities, feed efficiency and productivity of  
17 available food sources in fish. Here, we experimentally tested sound effects on swimming  
18 activities and foraging performance in thirty adult Zebrafish (*Danio rerio*) individually in  
19 captivity. We used adult zebrafish and water flea (*Daphnia magna*) as model predator prey,  
20 respectively. We also used four sound treatments with different temporal patterns (all in the  
21 same frequency range and moderate exposure level). Our results constitute strong evidence for  
22 clear sound-related effects on zebrafish behaviour. All sound treatments induced a significant  
23 increase in the number of startle response, brief and prolonged swimming speed for zebrafish  
24 ( $P < 0.05$ ). Zebrafish reached to the baseline swimming speed after 60 seconds in all treatments.  
25 We found partially brief and prolonged sound effects on spatial distribution of zebrafish;  
26 Although we did not find any significant sound-related behavioural changes for horizontal  
27 spatial displacement in all treatments ( $P > 0.05$ ), zebrafish swam significantly more in the lower  
28 layer of the fish tank except irregular intermittent 1:1-7 in brief sound exposure ( $P < 0.05$ ). The  
29 results of foraging performance showed that food discrimination error was low for the zebrafish  
30 and unaffected by sound treatments ( $P > 0.05$ ). However, food handling error was affected by  
31 sound treatments; all treatments caused a rise in handling error ( $P < 0.001$ ). This study highlights

32 the impact of sound on zebrafish swimming activities, and that more attacks are needed to  
33 consume the same number of prey items under noisy conditions.

34 **Keywords:** Anthropogenic sound, Behaviour, Foraging performance, Sound impact, Zebrafish

## 35 **1. Introduction**

36 Nowadays, due to the increase in human activities and the advancement of technology since  
37 the Industrial Revolution, the living environment has undergone extensive changes  
38 (Normandeau Associates, 2012). These environmental changes can affect the planet and living  
39 organisms, and that can be a major threat to the biodiversity inhabit Earth (Kunc et al., 2016).  
40 The rapid growth of these changes poses many environmental challenges (Tuomainen and  
41 Candolin, 2011) in both terrestrial and aquatic habitats. Environmental pollutions (including  
42 chemical, light, and sound) are introduced by human activities in different time, scale and space  
43 ranges and have elevated underwater ambient noise levels with alternating intensities which  
44 may affect aquatic organisms in their habitats. Among these, one of the main sources of  
45 environmental pollution which may also can be recognized as an environmental stress stimulus  
46 is anthropogenic sound that in addition to affecting terrestrial animals, also have many  
47 consequences on aquatic organisms (Popper et al., 2020; Slabbekoorn et al., 2010; Slabbekoorn  
48 and Ripmeester, 2008).

49 Sound sources in aquatic habitats, such as merchant shipping, recreational boating, wind  
50 turbines, pile-driving, underwater mining explorations, and explosions related to geological  
51 and research experiments, are frequent in the number of events and widespread geographically.  
52 (McDonald et al., 2006; Normandeau Associates, 2012). Consequently, anthropogenic sound  
53 has changed underwater soundscapes worldwide and represents a very subtle driver of  
54 environmental change and novel challenge to aquatic organisms. Moreover, the high speed of  
55 sound underwater, which is about 5 times faster than the speed of sound in air, shows the  
56 importance and priority of examining the role and applications of acoustic stimuli and their  
57 effects on aquatic organisms.

58 Recent studies have investigated impacts of anthropogenic sound on a wide variety of taxa and  
59 across a range of scales (Barber et al., 2009; Morley et al., 2014; Normandeau Associates,  
60 2012; Slabbekoorn et al., 2010; Thomsen et al., 2021; Tyack, 2008). Anthropogenic sound can  
61 cause physical, physiological, and behavioural disorders in aquatic organisms, including  
62 marine mammals (Erbe et al., 2018; Moore et al., 2012; Southall et al., 2008), seabirds  
63 (Bermúdez-Cuamatzin et al., 2018; Green et al., 2016; Hansen et al., 2020), reptiles (Injaian et

64 al., 2020; Simmons and Narins, 2018), fish (Hastings and Popper, 2005; Hawkins, 1986; Mills  
65 et al., 2020; Popper et al., 2003), and invertebrates (Carroll et al., 2017; Coquereau et al., 2016;  
66 Murchy et al., 2019).

67 Depending distance from the sound source, recent studies have shown dramatic effects of  
68 sound such as physical damages, sever injury or even death (Budelmann, 2011; Halvorsen et  
69 al., 2012; Keevin and Hemen, 1997). Further distance from the sound source, there may be  
70 physiological responses such as permanent and temporary hearing threshold shifts, fluctuations  
71 in physiological indices (André et al., 2011; Casper et al., 2013; McCauley et al., 2003; Popper  
72 et al., 2007; Popper et al., 2005; Scholik and Yan, 2002; Smith et al., 2004; Wysocki et al.,  
73 2007; Wysocki et al., 2006) such as elevated cortisol levels, the classical stress-related hormone  
74 (Johansson et al., 2016; Nichols et al., 2015; Santulli et al., 1999; Smith et al., 2004; Wysocki  
75 et al., 2006) and increased hear rates (Graham and Cooke, 2008; Simpson et al., 2015). Furthest  
76 distance from sound source, in a broader extent, behavioural effects are the most likely to occur  
77 and thus play as a stress driver (Popper and Hawkins, 2019) as a distracting stimulus (Popper  
78 and Carlson, 1998), interfere with detecting prey and antipredator behaviour (Hawkins and  
79 Myrberg, 1983), compromise foraging performance (Neo et al., 2015; Purser and Radford,  
80 2011; Shafiei Sabet et al., 2015; Voellmy et al., 2016), disrupt reproductive behaviour  
81 (McCloskey et al., 2020) or mask important acoustic signals and cues for conspecific  
82 recognition and communication purposes (Amorim et al., 2015; De Jong et al., 2018b; Hawkins  
83 and Picciulin, 2019) in a range of marine and freshwater species.

84 Many marine and freshwater fishes have well-developed hearing abilities that provide them a  
85 key biological privilege to detect sound and perceive a broad range of frequencies (Hawkins,  
86 1986; Heath et al., 2021; Popper et al., 2019; Wahlberg and Westerberg, 2005; Wysocki et al.,  
87 2006). While there are well-documented studies regarding the effects of sound on the behaviour  
88 of marine fishes (de Jong et al., 2018a; Mortensen et al., 2021; Peng et al., 2015), much less is  
89 known across the current literature about these effects on the behaviour of freshwater fishes  
90 (Fedoroff, 2021; Mickle and Higgs, 2018; Pieniazek et al., 2020). Moreover, sound exposure  
91 can also change spatial distribution and swimming behaviour of fish which may consequently  
92 affect ecologically on their avoiding to forage in noisy food areas and their navigations but also  
93 change biologically their swimming activities and foraging performance (de Vincenzi et al.,  
94 2021; Hanache et al., 2020; Hubert et al., 2021; Shafiei Sabet et al., 2016a). Currently, little is  
95 known about the effects of sound exposure on swimming activity and foraging performance of  
96 fish, although there are some well-documented studies. It has been shown that increased

97 boating activity was associated with a reduction in activity rates, changed vertical distribution  
98 and compromised foraging success of free-ranging mulloway (*Argyrosomus japonicus*) (Payne  
99 et al., 2015) and Mediterranean Damselfish (*Chromis chromis*) (Bracciali et al., 2012).

100 Other studies have shown that experimental sound exposure increase performance errors and  
101 therefore displayed a negative impacts on foraging efficiency in both the three-spined stickle  
102 backs (*Gasterosteus aculeatus*) (Purser and Radford, 2011) and the European minnow,  
103 (*Phoxinus phoxinus*) (Voellmy et al., 2014a). More recently our previous study also have  
104 shown a clear sound impact on zebrafish foraging performance; more food handling errors  
105 under noisy conditions (Shafiei Sabet et al., 2015). A primary consequence of sound exposure  
106 would appear to be shifts in the spatial displacement. The resulting disturbance might induce  
107 modifications in allocated foraging time budget, foraging patterns and the relative abundance  
108 of prey items and predatory species. Such changes in turn may increase foraging energy  
109 demand and the amount of time allocated by fish to foraging which, subsequently induce a  
110 number of major changes such as affect food searching, discriminating and handling.

111 In general, *Danio rerio* is known as a model fish species in behavioural studies and responding  
112 to environmental conditions (Cachat et al., 2010; Egan et al., 2009; Whitfield, 2002). Zebrafish  
113 is a member of the Cypriniformes order and the Cyprinidae family and acclimates well in  
114 captivity (Detrich et al., 2011). This fish naturally lives in the tropical freshwater (Spence et  
115 al., 2008). Morphologically, the zebrafish's body is narrow and elongated, with golden and blue  
116 stripes that stretch along the body and tail (Detrich et al., 2004). Males and females are easily  
117 separable, so that females having a more prominent abdomen and body than males, and males  
118 have a spindle-shaped body (Spence et al., 2008). Zebrafish live in the temperature range of  
119  $24\pm 2$  °C and in the pH range of 6.8 to 7.5 (Cortemeglia and Beiting, 2005). The adult size of  
120 the zebra fish is approximately 4.5 to 6.5 cm (Gerhard et al., 2002; Spence et al., 2008). In  
121 recent years, zebrafish have been used as biological models in genetic, physiological,  
122 toxicological, behavioural, ecological, and other studies (Detrich et al., 2004; Gerlai, 2019;  
123 Gerlai et al., 2000; Kalueff and Cachat, 2011; Lieschke et al., 2009). The high genetic,  
124 physiological, and pharmacological similarities of this species with humans could be a reason  
125 for the use of this species as a biological model in research (Crawford et al., 2008).

126 Progress in behavioural biology and findings about the potential impacts pollutants on  
127 organisms is also to a large extent linked with the study of invertebrates. *Daphnia* is a small  
128 crustacean and inhabits in open and light waters, also they are an important part of the food

129 web in freshwater habitats and inhabits many types of shallow water bodies (Ebert, 2005;  
130 Parejko and Dodson, 1991; Reynolds, 2011). This invertebrate is the first crustacean to have  
131 its genome sequenced (Stollewerk, 2010) and because of features such as easy cultivation,  
132 small size and short generation time it is a popular model organism in various biological  
133 disciplines from aquatic ecology to biomedical sciences (Seda and Petrusek, 2011). *Daphnia*  
134 may also be a useful species to study behavioural studies such as sound impacts on  
135 invertebrates.

136 In addition, it has been reported that in the larval stage, marine crustaceans respond to reef  
137 sounds (Radford et al., 2008). Also, the aquatic invertebrate larvae, which were the same size  
138 as the *Daphnia*, reacted to natural sounds and sounds from human activities, and their  
139 swimming activities have changed accordingly (Morley et al., 2014). *Daphnia* is used as a  
140 model in ecological (Stollewerk, 2010), physiological (Altshuler et al., 2011), genetic (Harris  
141 et al., 2012; Miner et al., 2012), toxicological (Shaw et al., 2008), and parasitological (Ebert,  
142 2008) studies.

143 In the present study, we investigated whether experimental sound exposure ensounded by an  
144 underwater speaker affect the general swimming activities and foraging behaviour of zebrafish  
145 under laboratory conditions. Our specific goals were: firstly, to assess the effect of  
146 experimental sound exposure on zebrafish swimming speed and spatial displacement.  
147 Secondly, to estimate whether the temporal pattern of sound exposure matters and affects  
148 differently zebrafish behaviour. And thirdly, to verify our recent laboratory-based findings of  
149 sound impacts on zebrafish swimming activity and foraging behaviour.

## 150 **2. Materials and Methods**

151 This study was performed in the ornamental fish breeding facility center at Fisheries  
152 Department, Faculty of Natural Resources, University of Guilan, located in Sowmeh Sara city,  
153 Guilan province, Iran (37°17'39"N, 49°19'55"E), using an aquarium with dimensions of  
154 50×15×20 cm with a volume of water intake of 112.5 liters in the period of 1000 to 1400 every  
155 day. Zebrafish (approximate age of 45 days old and of the wild-type, short-fin variety weight  
156 ( $\pm$  standard deviation) of  $1.23 \pm 0.02$  g) were obtained from an ornamental fish breeding center  
157 located in Bazar-Jomeh in Sowmeh-Sara county, Guilan province, Iran.

158 Zebrafish were stored in a stock tank with dimensions 50×30×40 cm for two weeks and adapted  
159 to environmental conditions to reduce possible stress and hormonal changes due to  
160 transportation, captivity conditions and animal welfare issues (Deakin et al., 2019). The fish

161 were fed 0.8 mm commercial Biomar® feed until the day before the experiment (Neo et al.,  
162 2015).

163 Waterfleas were caught every morning, during the whole experiment days, from the surface  
164 layer of the pool of the faculty, by a plankton net with a net mesh size of 0.2 mm. This was  
165 done by horizontal twisting at a depth of 10 cm and a length of 30 cm and was kept overnight  
166 in a separate tank at the same temperature as the test tank to adapt to the temperature conditions.  
167 According to the previous study of Shafiei Sabet et al. (2019) as well as the same sampling  
168 location and depth in the same time period with present study and the identification key used  
169 in the previous Daphnia species study, *Daphnia magna* was identified (Shafiei Sabet et al.,  
170 2019).

### 171 2.1. Sound treatments

172 In the present experiment, four sound treatments with different temporal patterns along with  
173 control treatment were used, including the first treatment as control treatment in which the fish  
174 were exposed to ambient noise (AN). Second treatment, Continuous sound (CS) (Fig. 1 (a)),  
175 third treatment, regular intermittent noise (IN) with fast pulse rate (1:1), fourth treatment,  
176 regular intermittent sound with slow pulse rate (1:4) and Fifth treatment is the irregular  
177 intermittent sound (1:1-7). All three intermittent treatments include one second of sound, but  
178 the difference between these sound treatments is the intervals between these sounds (silence  
179 time), which are described in detail below.

180 Regular intermittent sound with a fast pulse rate (1:1) involves one second of sound and one  
181 second of silence (Fig. 1 (b)). Regular intermittent sound with slow pulse rate (1:4) consists of  
182 one second of sound and four seconds of silence (Fig. 1 (c)) and irregular intermittent sound  
183 (1: 1-7) includes one second of sound and interval 1, 2, 3,4 ,5, 6 or 7 seconds of silence is  
184 random (Fig. 1 (d)). Also, the sound treatments that are broadcast for different fish on different  
185 days were identified quite randomly.

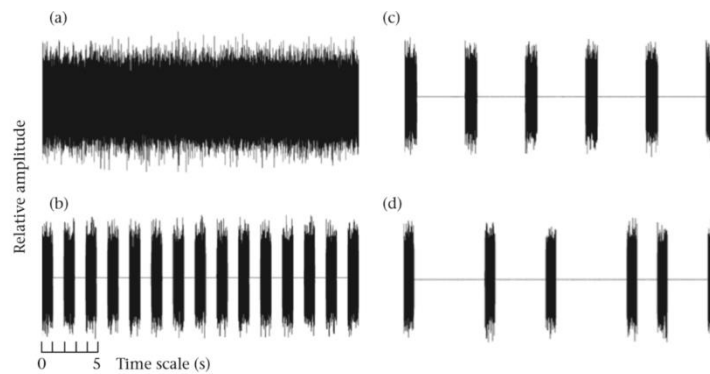

186

187 **Figure 1:** Continuous and intermittent sound patterns used in the experiment. (a) Continuous sound pattern, (b)  
188 Regular intermittent sound treatment with fast rotation speed (1:1), (c) Regular intermittent sound treatment with  
189 slow rotation speed (1: 4), (d) Irregular intermittent sound treatment (1:1-7).

190 The sound treatments were performed with Audacity software (2.3.1) at the sound frequency  
191 that can be detected and heard for zebrafish (300-1500 Hz) (Higgs et al., 2002) as well as the  
192 bandwidth of anthropogenic sounds, including vehicles, pump systems, and similar pile driving  
193 that overlap (Slabbekoorn et al., 2010). The designed sound was produced by software in the  
194 same sound range of 400-2000 Hz.

## 195 2.2. Experiment Tank

196 The experimental tank with dimensions of 50×20×15 cm with black background was prepared  
197 to increase the contrast between Daphnia and fish in the video file. During the broadcast of the  
198 sound treatments, the experiment tank was filmed by a video camera (Panasonic HC-V180 Full  
199 HD 28 mm Wide Lens Camcorder) at a distance of about 50 cm from in front of the test tank.  
200 After production of sound treatments, they were played by a player connected (Sony Vaio  
201 SVF1421A4E Laptop) to an underwater speaker (custom-build speaker in Iran, 8Ω, 30 W, 10  
202 Hz- 10 KHz).

203 In this experiment, a divider plate was placed transversely in the tank and the tank length was  
204 halved (25×20×15 cm) in order to increase the enclosure on the Zebrafish swimming  
205 environment and make the entire fish swimming space visible (Fig. 2). In order to reduce the  
206 stress of the fish and also to reduce the effects of people moving to the test site, the test tank  
207 was surrounded by black plastic so that the fish's behaviour was not affected by other factors  
208 and only the camcorder lens passed through the plastic and was the same for all treatments and  
209 repetitions. In such a way that when disconnecting and connecting the camcorder between  
210 sound treatments, the fish is not seen and is not affected.

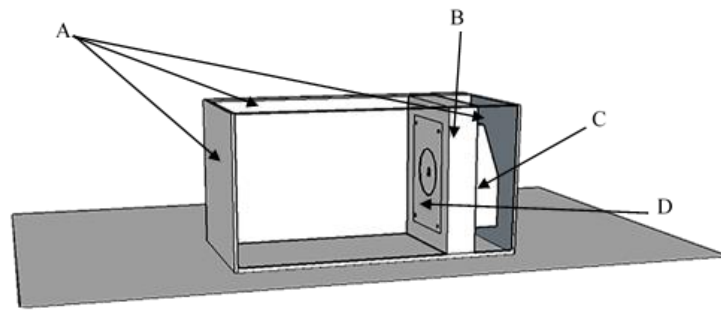

211

212 **Figure 2:** Schematic view of the test tank. A: The obscured pages of the test tank to enhance the fish's visual  
213 contrast in the film. B: Underwater speaker space separator screen with fish swimming space. C: Underwater  
214 speaker holder box. D: Underwater speaker.

215 The physicochemical properties of the water were the same and monitored regularly on a daily  
216 basis. The photoperiod used in the experiment was 12 hours of light and 12 hours of darkness  
217 (Higgs et al., 2002; Villamizar et al., 2014) and the light intensity measured in this experiment  
218 by the light meter model (TES\_1336A – TES Electrical Electronic Corp. Taiwan) averaged 62  
219 lux. Water temperature was measured during the experiment  $26 \pm 1$  °C and also the amount of  
220 dissolved oxygen in the water was measured  $8 \pm 1$  mg / L.

221 The underwater speaker used in the experiment was placed horizontally on the other side of  
222 the separator plate (See Fig. 2). In this experiment, after introducing the fish to the test tank  
223 during the night for about 20 hours, the fish was given the opportunity to adapt to the  
224 environment so that it could use the entire tank space for swimming and display natural  
225 swimming behaviour (Shafiei Sabet et al., 2015) and have the normal conditions (Neo et al.,  
226 2015; Shafiei Sabet et al., 2015). Then, test was performed with a video camera located in front  
227 of the tank. After ten minutes, the sound treatment was played by a speaker and a sound player  
228 for 20 minutes, However, the food item (Daphnia) and non-food item (Duckweed) added to the  
229 experiment tank after ten minutes from sound playback. The nutrition of the predatory species  
230 was investigated. This same process was performed for the other sound treatments with a 15-  
231 minute interval between treatments and the fish was exposed to all five acoustic treatments and  
232 repeated the next day for the next fish (Fig. 3). The order of broadcast of sound treatments on  
233 a daily basis was randomly balanced.



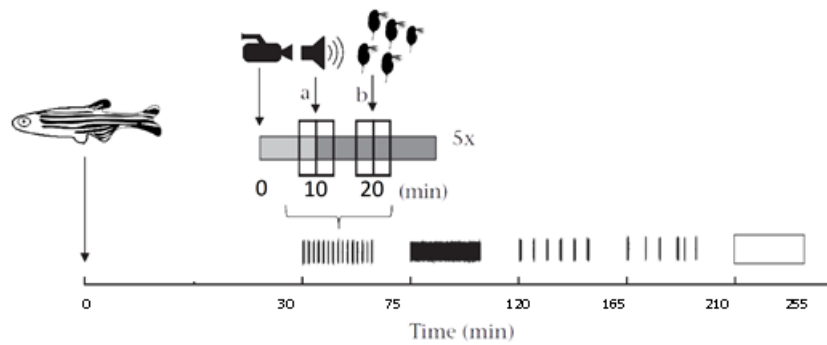

234

235 **Figure 3:** Schematic of the time scale of exposure to the sound of each Zebrafish. Each fish underwent five sound  
236 treatments during the experiment: continuous sound (CN), 1:1, 1:4, 1: 1-7, and ambient sound (AN) as control  
237 evidence. Each sound treatment was played for 20 minutes on an underwater speaker, and 10 minutes before the  
238 sound treatment was filmed by the camera. In this experiment, we examined behavioural changes by comparing  
239 two time periods in two moments: 1. Up to 10 minutes before and after exposure to sound treatments to check the  
240 effect of sound and 2. Up to 10 minutes before and after the introduction of *Daphnia* to examine the effect Sound  
241 on foraging behaviour.

### 242 2.3. Underwater sound measurement

243 In order to check the intensity of the sound that can be played by the underwater speaker and  
244 to understand whether the tested fish was able to detect and perceive the sound treatments or  
245 not, first the continuous treatment sound file was played back using a laptop sound player (Sony  
246 Vaio SVF1421A4E) connected to a custom-build underwater speaker which a custom-build  
247 sound tuning amplifier was attached. The level of sound intensity under water was recorded by  
248 a hydrophone model (Aquarian Scientific AS-1) which connected to the amplifier model (PA-  
249 4) and a Tascam linear PCM recorder model (DR-100MKII). The recorded sound file was  
250 evaluated in Rstudio software (Version 1.1.456 - © 2009-2018 RStudio, Inc.).

251 According to the Fig. 4, during continuous sound playback, the frequency range emitted from  
252 the underwater speaker was completely in the zebrafish's hearing range in the range of 300-  
253 1500 Hz (Higgs et al., 2002) and far above the ambient noise playback. The sound pressure of  
254 continuous sound treatment during playback was average 121 dB ref 1  $\mu\text{Pa}^2/\text{Hz}$  for 5 seconds  
255 and the ambient sound pressure was average 96 dB ref 1  $\mu\text{Pa}^2/\text{Hz}$  for 5 seconds.

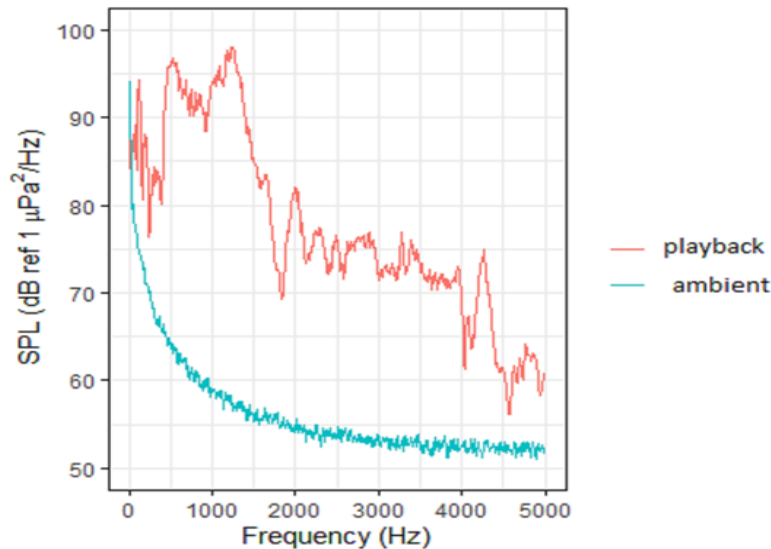

256

257 **Figure 4:** Spectral distribution of continuous sound pressure level compared to silent treatment (dB ref 1  
258  $\mu\text{Pa}^2/\text{Hz}$ ). Silence conditions (blue) and continuous sound playback (red). The diagram shows that the sound  
259 intensity level has increased significantly in the range of hearing frequencies of zebrafish.

#### 260 2.4. Effect of sound on Zebrafish swimming behaviour

261 To investigate the effect of sound on the behaviour of Zebrafish, 30 fishes (15 males and 15  
262 females) were introduced individually in the experimental tank after biometrics. The fish were  
263 introduced to the test tank in last day (Overnighting) and the fish were given the opportunity  
264 to get used to the environment so that they could use the entire space of the tank for their  
265 swimming and have normal conditions. Also, all fish were given 30 minutes to relax. Since  
266 then, the fish has undergone five sound treatments.

267 Zebrafish behavioural response to five sound treatments was video recorded for a maximum of  
268 30 minutes for each treatment (maximum 20 minutes for exposure and a maximum of 10  
269 minutes before exposure) (Fig. 3). Swimming behaviour parameters such as startle response  
270 (which is the peak of swimming speed of fish more than 10 cm per second that occurs  
271 immediately after the sound was played for one minute (See Shafiei Sabet et al. (2015)), brief  
272 swimming speed (5 seconds before and 5 seconds during sound) and prolonged swimming  
273 speed (one minute before and one minute during sound) were evaluated for all treatments.

274 Also, to explore spatial distribution of fish in the tank, in the vertical/column profile, according  
275 to the dewatering height of 15 cm of the test tank, tank height during inspection and analysis  
276 behavioural data was divided into two parts: zero to 7.5 cm and 7.5 to 15 cm. To check the

277 distance from the sound source in the horizontal profile, the length of the tank was divided into  
278 three parts: zero to 8.33 cm, 8.33 to 16.66 cm and 16.66 to 25 cm.

### 279 *2.5. Effect of sound on foraging behaviour of zebrafish on water fleas*

280 As mentioned earlier (Fig. 3), the effect of sound on the foraging behaviour of zebrafish was  
281 investigated in such a way that 5 waterfleas (about three millimeters) as a prey species (target)  
282 and 5 non-food substances as non-food item in the same size as Daphnia (about three  
283 millimeters) was mixed in 25 ml beaker and added to the fish tank in the same manner for all  
284 treatments. The waterfleas were in the same sizes that caught with plastic Pasteur pipettes to  
285 decrease damaging water, which is suitable for feeding this species of fish at puberty and can  
286 be received by the mouth of the fish (Shafiei Sabet et al., 2015). Naturally, both of food and  
287 non-food items are present in the habitat of this fish.

288 To investigate the effect of sound treatments on the foraging power of Zebrafish, the parameters  
289 of food discrimination error (Formula 1) and food handling error (Formula 2) were measured.

$$290 \text{ Food Discrimination Error} = \frac{\text{number of non-food item attacks}}{\text{total number of food and non-food attacks}} \quad (\text{Formula 1})$$

$$291 \text{ Food Handling Error} = \frac{\text{number of unsuccessful attacks on water fleas}}{\text{total number of successful and unsuccessful attacks on water fleas}} \quad (\text{Formula 2})$$

### 292 *2.6. Behavioural information processing and statistical analysis*

293 Recorded videos of zebrafish behaviour were converted to 10 frames per second by Xilisoft  
294 Video Converter Ultimate software to reduce the magnification of time, in order to increase  
295 the accuracy of the fish swimming survey and also to reduce the fish speed for spatial inspection  
296 per second. Logger Pro software (Vernier Software & Technology, Beaverton, OR, U.S.A.,  
297 version 3.6.0) was used to examine behavioural responses including the number of explosive  
298 movements, swimming speed, and spatial distribution of the fish. Entering information and  
299 data in M.S. Excel 2016 and data analysis was performed using SPSS 25 software. The  
300 normality of the data was evaluated by Kolmogorov-Smirnov test and the homogeneity of the  
301 data by Levene test. Then, the presence or absence of significant differences between the mean  
302 of the data was assessed by repeated measures ANOVA analysis and using Tukey multi-range  
303 test. A HuynheFeldt correction was performed when sphericity could not be assumed in the  
304 repeated measures ANOVA. Bonferroni corrected post hoc tests were performed when  
305 ANOVA test results were significant. The level of significance in this study was considered  
306  $P < 0.05$ . A custom-written acoustic calibration script in R studio software (Version 1.1.456 - ©

307 2009-2018 RStudio, Inc.) was also used to evaluate sound pressure levels and power spectral  
308 density that were played by the underwater speaker.

### 309 **3. Ethical note**

310 We considered the 3Rs in behavioural research, the guidelines with respect to Good Laboratory  
311 Practice (GLP). All housing, handling and experimental conditions were in accordance with  
312 the guidelines for the treatment of animals in behavioural research and teaching (ASAB, 2020).  
313 Water fleas and zebrafish were allowed to acclimatize gradually to the laboratory conditions  
314 before they were used in any of the experiments and showed no signs of adverse effects of the  
315 experimental conditions. Zebrafish showed only a brief startle response with the onset of the  
316 moderate sound playbacks and no mortalities or physical damages were observed during  
317 experiments (Neo et al., 2015; Shafiei Sabet et al., 2015). There are no legal requirements for  
318 studies involving waterfleas (*Daphnia*) in Iran. The principal investigator (S.SH.S) passed the  
319 exam for the course on laboratory animal science at Leiden University, the Netherlands and  
320 holds animal testing act certificate “as an Article 9 researcher”.

### 321 **4. Result**

#### 322 *4.1. Impact of sound on swimming behaviour of Zebrafish*

323 Experimental sound exposure has changed zebrafish swimming activities in different ways.  
324 Sound treatments significantly increased the parameters of startle response and swimming  
325 speed of fish (Fig. 5a, b, c). The number of startle response instantly increased in exposure to  
326 sound treatments so that all sound treatments showed a significant difference compared to the  
327 ambient condition (repeated measures ANOVA:  $F_{3,23,93.68}=6.31$ ,  $P=0.000435$ ), But no  
328 significant differences were observed in terms of temporal patterns between sound treatments  
329 ( $P>0.05$ ) (Fig 5a). Also, in the brief swimming speed difference (5 seconds before the sound  
330 and 5 seconds during the sound) there was a significant difference compared to the ambient  
331 condition (repeated measures ANOVA:  $F_{3,06,88.70}=11.17$ ,  $P=0.000002$ ), although there was no  
332 significant difference between the sound treatments with different temporal patterns in this time  
333 period ( $P>0.05$ ) (Fig 5b). This difference in swimming speed in exposure to sound treatments  
334 was also true in prolonged (60 seconds before the sound and 60 seconds during the sound), so  
335 that there was a significant affect between sound treatments compared to ambient conditions  
336 (repeated measures ANOVA:  $F_{3,39,98.34}=7.72$ ,  $P=0.000054$ ), however again there was  
337 nonsignificant difference between sound treatments ( $P>0.05$ ) (Fig 5b).

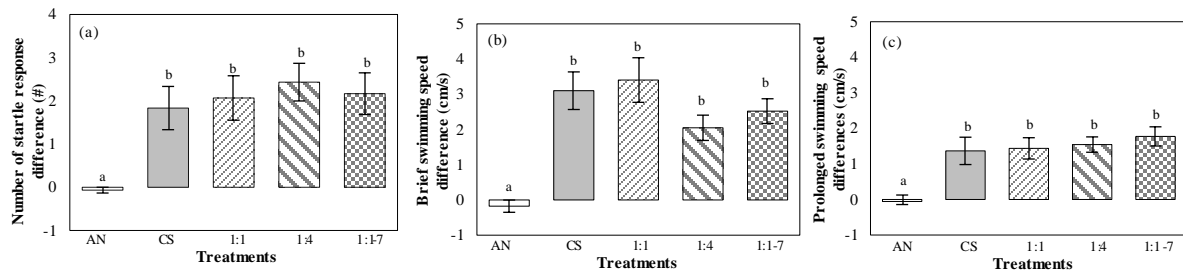

338

339 **Figure 5.** Effect of sound exposure treatment on swimming behaviour of Zebrafish. (a) Number of  
340 startle responses expressed as the difference between the first 60 seconds during sound and the last 60 seconds  
341 before sound exposure onset: Continuous sound (CS) and three intermittent sound (1:1, 1:4, 1:1-7) and Ambient  
342 noises (AN) as control treatment (N=30,  $F=6.312$ ,  $P=0.000435$ , Standard error changes ( $\pm 1$ )). (b) Brief swimming  
343 speed difference of Zebrafish between the first 5 seconds during sound and the last 5 seconds before sound  
344 exposure on each four sound treatments and the ambient (N=30,  $F=11.172$ ,  $P=0.000002$ , Standard error changes  
345 ( $\pm 1$ )). (c) Prolonged swimming speed difference of Zebrafish between the last 60 seconds before sound and the  
346 first 60 seconds during sound exposure on five treatments (N=30,  $F=7.725$ ,  $P=0.000054$  Standard error changes  
347 ( $\pm 1$ )).

348 According to Figure 6, in four sound treatments (CS, 1:1, 1:4, 1:1-7), a sudden increase in fish  
349 swimming speed was observed once sound treatments were played at 60 seconds. Observations  
350 also showed that in all sound treatments, fish reached the baseline after 60 seconds during  
351 sound. In ambient condition (Fig 6a), no significant difference in swimming speed was  
352 observed in any of the time periods. While in continuous sound and regular intermittent 1:1  
353 treatment (Fig 6b, c), a significant difference was observed in the comparison of 5 seconds  
354 before sound playback and the first 5 seconds of sound playback (CS= repeated measure  
355 ANOVA:  $F_{4.54,131.66}=9.53$ ,  $P\leq 0.001$ , 1:1= repeated measure ANOVA:  $F_{3.85,111.72}=11.72$ ,  
356  $P\leq 0.001$ ). This is while in this treatment, compared to the last 5 seconds before the sound and  
357 the last 5 seconds of the sound, fish reached the base line and there was no difference ( $P>0.05$ ).  
358 Also, this difference was observed in the two treatments regular intermittent 1:4 and irregular  
359 intermittent 1:1-7 (Fig 6d, e) with more intensity compared to before and during the sound  
360 (1:4= repeated measure ANOVA:  $F_{6.24,181.01}=14.17$ ,  $P\leq 0.0001$ , 1:1-7= repeated measure  
361 ANOVA:  $F_{7.14,207.15}=15.01$ ,  $P\leq 0.0001$ ). But in comparing the baseline time in these two  
362 treatments, no significant difference was observed and the fish reached the baseline ( $P>0.05$ ).

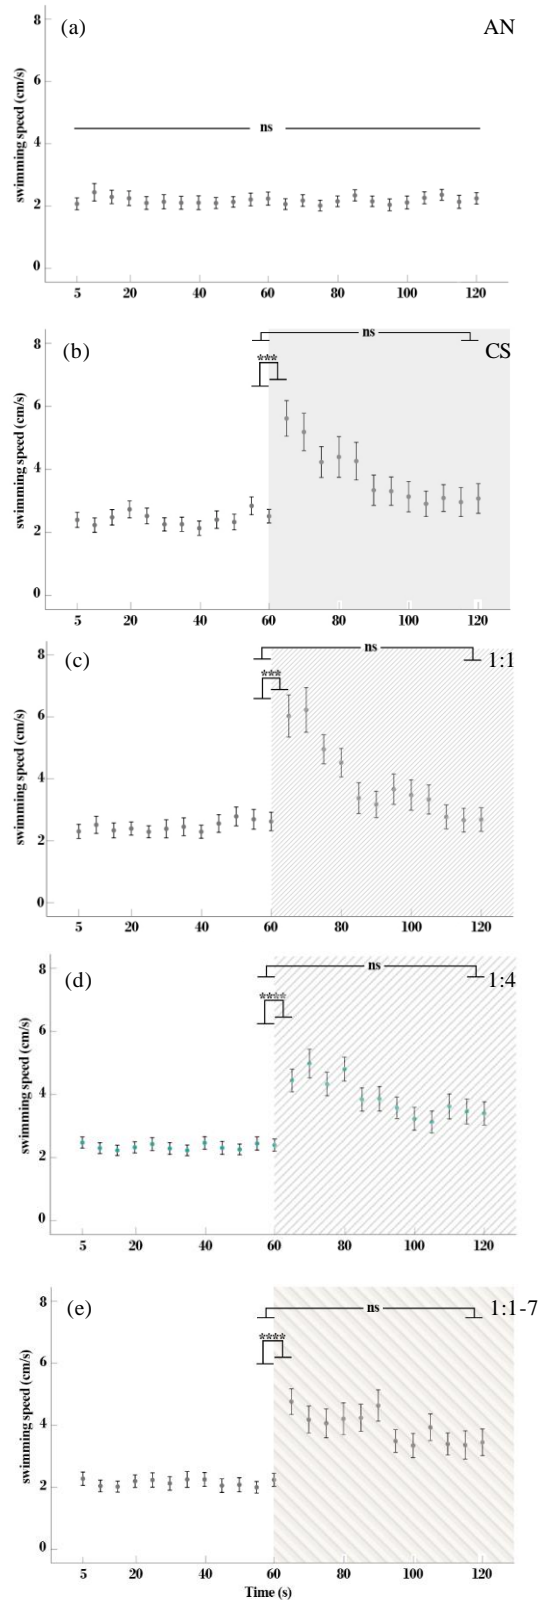

363

364 **Figure 6.** Effect of sound treatments on zebrafish swimming speed. (a) Ambient condition. (b) Continuous sound.  
365 (c) regular intermittent 1:1. (d) regular intermittent 1:4. (e) irregular intermittent 1:1-7. The time was divided into  
366 three period bins for formal statistical analysis: the last 5 seconds before sound exposure, the first 5 seconds during  
367 sound exposure and the last 5 seconds during sound exposure. (NS= no significance, \*\*\*=  $P \leq 0.001$ , \*\*\*\*=  
368  $P \leq 0.0001$ ).

369 Changes in the spatial distribution of Zebrafish were investigated when exposed to sound  
370 treatments in vertical scale (lower layer) (Fig. 7a, b) and horizontal scale (X position) (Fig. 8a,  
371 b). According to Figure 7a, the average percentage of fish time spent in the lower layer of the  
372 tank during sound treatments exposure over a brief time (15 seconds before sound and 15  
373 seconds during sound exposure) there was no treatment effect ( $F_{3,77,109.47}=1.486, P=0.214$ ) or  
374 interaction for treatment\*times ( $F_{3,55,102.92}=0.634, P=0.621$ ). But there was effect of times  
375 ( $F_{1,29}=28.274, P=0.000011$ ). In two treatments of ambient (AN) and irregular intermittent  
376 sound (1:1-7) with before sound exposure was not significant effect (AN=  $F_{1,29}=28.274,$   
377  $P=0.104, 1:1-7= F_{1,29}=28.274, P=0.051$ ). But there was a significant difference between two  
378 sound treatments: continuous sound (CS) and 1:4 during and before exposure to sound (CS=  
379  $F_{1,29}=28.274, P=0.007, 1:4= F_{1,29}=28.274, P=0.004$ ) and also 1:1 treatment was a significant  
380 difference with before the sound exposure ( $F_{1,29}=28.274, P=0.011$ ). According to Figure 7b,  
381 the average percentage of fish time spent in the lower layer of the tank during sound treatments  
382 over a prolonged time (60 seconds before sound and 60 seconds during sound exposure), there  
383 was no treatment effect ( $F_{3,65,105.92}=1.837, P=0.133$ ) or interaction for treatment\*times  
384 ( $F_{4,116}=1.780, P=0.137$ ). But there was effect of times ( $F_{1,29}=35.398, P=0.000002$ ). In control  
385 treatment (AN) between before and during sound exposure do not show a significant difference  
386 ( $F_{1,29}=35.398, P=0.975$ ). While in continuous treatment (CS) and 1:4 between before and  
387 during sound exposure showed a significant difference (CS=  $F_{1,29}=35.398, P=0.000411, 1:4=$   
388  $F_{1,29}=35.398, P=0.000360$ ) and 1:1 treatment was significant difference between during  
389 exposure and before time ( $F_{1,29}=35.398, P=0.008$ ). Also, irregular intermittent sound treatment  
390 (1:1-7) between during and before sound exposure was significant difference ( $F_{1,29}=35.398,$   
391  $P=0.042$ ). But in the horizontal profile (X position), there was no significant difference  
392 between sound treatments and control conditions, both in the brief and prolonged time  
393 ( $F_{4,116}=1.369, P=0.249$ ) (Fig 8a) ( $F_{3,78,109.71}=1.810, P=0.136$ ) (Fig 8b). Also, according to  
394 Figure 9a, b, the effects of different sound patterns on the spatial distribution of fish can be  
395 seen as a heat map in brief and prolonged duration. Acoustic treatments affected changes in  
396 swimming pattern from the top layer to the bottom layer but had no effect on the distance from  
397 the sound source (right side of the tank).

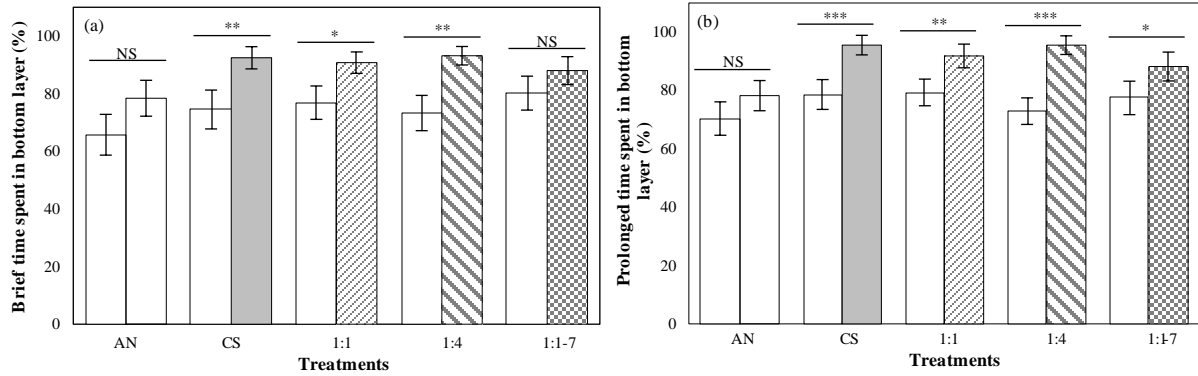

398

399 **Figure 7.** Average percentage of fish time spent in bottom layer of tank (N=30). (a) Brief time (15 seconds before  
 400 and 15 seconds exposed to sound) (NS= no significance, \* =  $P \leq 0.05$ , \*\* =  $P \leq 0.01$ ). (b) Prolonged time (60 seconds  
 401 before and 60 seconds exposed to sound) (NS= no significance, \* =  $P \leq 0.05$ , \*\* =  $P \leq 0.01$ , \*\*\* =  $P \leq 0.001$ ). Bottom  
 402 layer area for spatial displacement was defined as the bottom layer with a vertical distance of 10 cm from the  
 403 bottom of the tank. (df= 1) Standard error changes ( $\pm 1$ ).

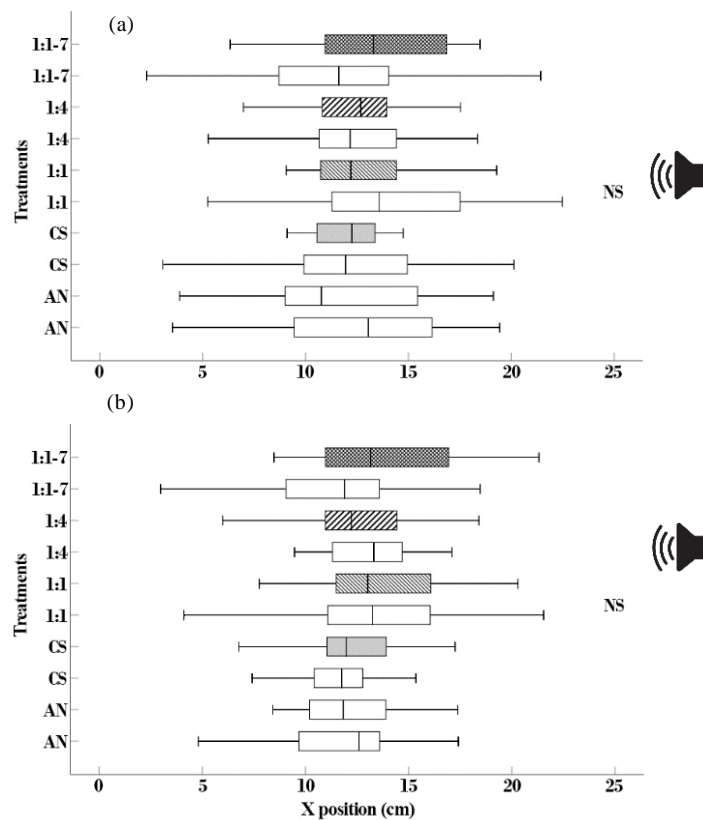

404

405 **Figure 8.** Effect of sound exposure on horizontal spatial distribution of Zebrafish. (a) Brief time (15 seconds  
 406 before and 15 seconds exposed to sound). (b) Prolonged time (60 seconds before and 60 seconds exposed to  
 407 sound). The underwater speaker played back from the right tank. Bars show Means  $\pm$  SE.



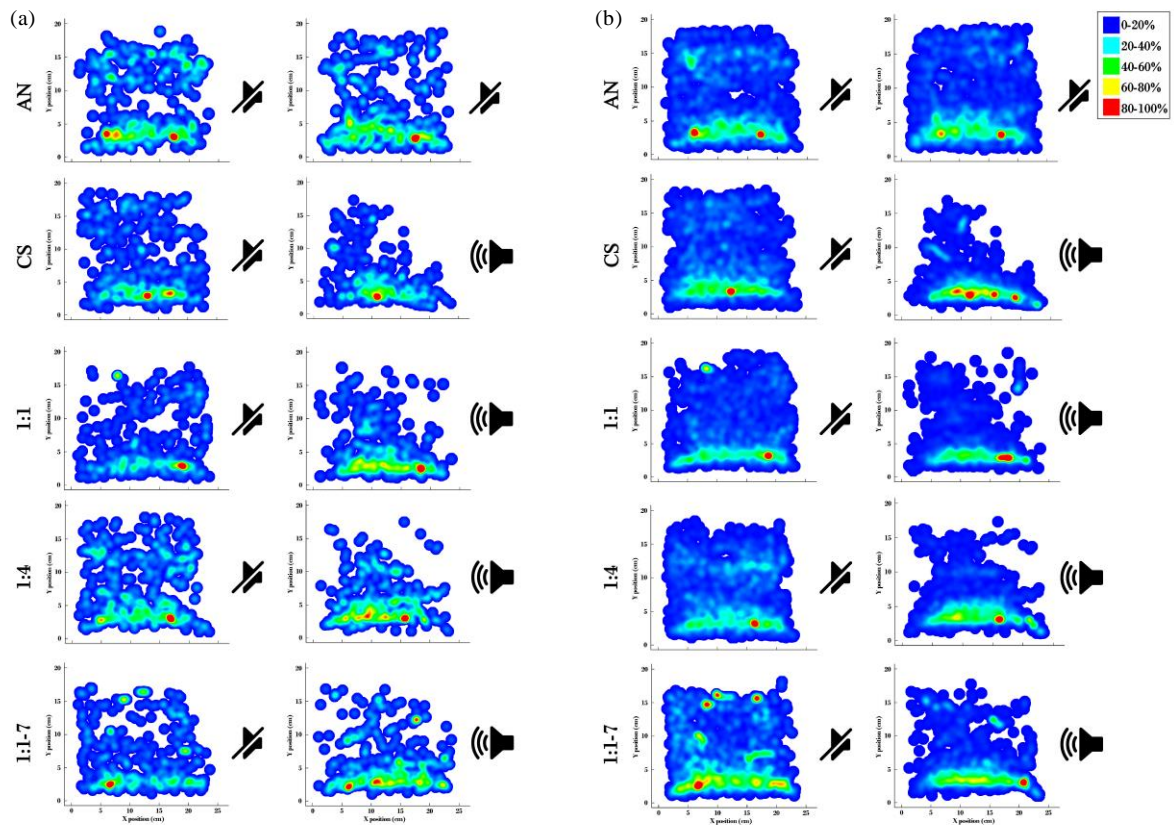

408

409 **Figure 9.** Heat map of fish swimming in the tank environment. (a) Brief time (15 seconds before and 15 seconds  
410 exposed to sound). (b) Prolonged time (60 seconds before and 60 seconds exposed to sound). The blue color  
411 (#0000FE) indicates the 0-20 % of the fish in the tank. The aqua color (#01FFFF) indicates the 20-40 % of the  
412 fish in the tank. The lime color (#00FF01) indicates the 40-60 % of the fish in the tank. The yellow color  
413 (#FFFF01) indicates the 60-80 % of the fish in the tank. The red color (#FE0000) indicates the 80-100 % of the  
414 fish in the tank. The underwater speaker played back from the right tank.

#### 415 4.2. Impact of sound on foraging performance of Zebrafish

416 According to Figure 10a, none of the acoustic treatments showed a significant difference  
417 compared to the silent treatment on zebrafish food discrimination error (repeated measure  
418 ANOVA:  $F_{4,116}=1.339, P=0.260$ ). In fact, there was no food discrimination error between food  
419 and non-food item by broadcasting sound treatments compared to control treatment. However,  
420 all acoustic treatments showed a significant difference compared to the control treatment  
421 (repeated measure ANOVA:  $F_{2,82,81.91}=26.023, P\leq 0.001$ ) but no significant difference was  
422 observed between sound treatments ( $P>0.05$ ) (Fig. 10b). This means that with the broadcast of  
423 acoustic treatments compared to the control treatment, there was a significant handling error in  
424 food intake in the food.

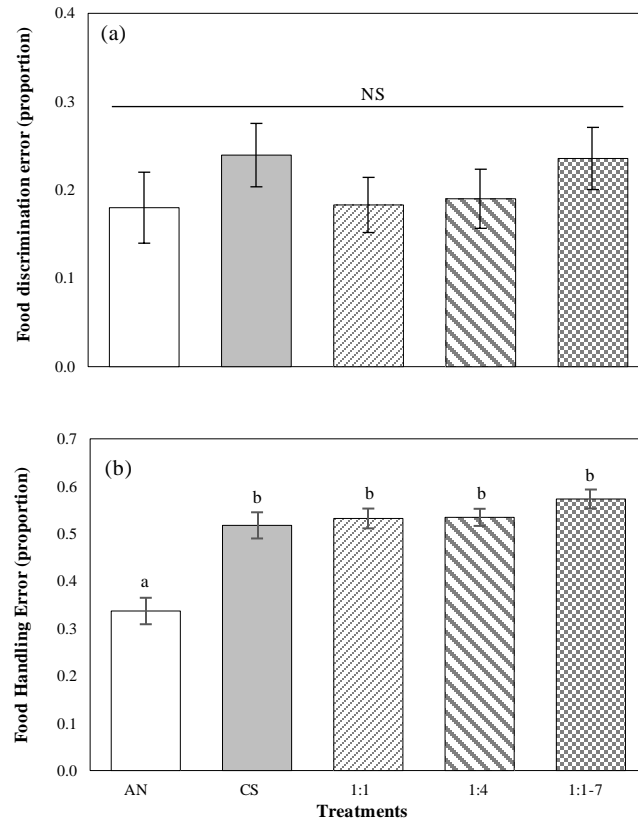

425

426

427 **Figure 10.** Effect of sound treatment on foraging behaviour of Zebrafish. (a) Food discrimination error as the  
428 proportion of duckweed particles attacked relative to the total number of attacks to both duckweed particles and  
429 water fleas from the introduction of food items until the end of sound exposure in sequence for each zebrafish  
430 individual. (N=30,  $df=3.756$ ,  $F=1.339$ ,  $P=0.226$ ) (b) Food handling error as the proportion of the total of water  
431 fleas attacked that were missed or released again after initial grasping from onset of food introduction until the  
432 end of sound exposure in sequence for each zebrafish individual. (N=30,  $df=2.825$ ,  $F=26.023$ ,  $P=0.000019$ ).  
433 Standard error changes ( $\pm 1$ )

## 434 5. Discussion

435 In this experiment, our results unequivocally demonstrate that acoustic stimuli affect zebrafish  
436 behaviour and swimming activities under laboratory conditions. Zebrafish swimming  
437 behaviour indices such as the number of startle response, the difference in brief swimming  
438 speed (within 5 seconds), the difference in prolonged swimming speed (within 60 seconds) and  
439 the spatial distribution of zebrafish such as the percentage of fish in the lower layer of the tank  
440 and horizontal spatial distribution in response to continuous and intermittent sound patterns  
441 were examined. The results showed that the number of startle response indicating anxiety in  
442 zebrafish and other aquatic species (Blaser et al., 2010; Maximino et al., 2010), in different  
443 sound treatments, showed a significant difference compared to control condition. However,  
444 these changes did not show a significant difference between sound treatments. Also, in another

445 part of the results, the difference between brief and prolonged swimming speeds in all sound  
446 treatments compared to the control condition was significant. However, these changes did not  
447 show a significant difference between sound treatments. Moreover, interestingly like what we  
448 have shown in our earlier study (Shafiei Sabet et al., 2015), we have seen the same impact of  
449 sound exposure on foraging performance in zebrafish as all will be discussed further as follows  
450 in the next sections.

#### 451 *5.1. Startle responses as a specific indicator of moderate anxiety in zebrafish?*

452 Startle response is an involuntary action that is controlled by a pair of brain neurons in the  
453 Mauthner (M-) cells in the mesencephalon and play a major role in the decision-making process  
454 (Eaton et al., 1977; Eaton et al., 1991; Mirjany et al., 2011; Zottoli, 1977). Increasing the  
455 intensity of the sound triggers a response by involuntary Mauthner cells in the mesencephalon,  
456 leading to an involuntary escape response in fish (Eaton et al., 1977; Eaton et al., 1991).  
457 Increasing the number of startle response and brief swimming speed of fish by playing sound  
458 treatments, causes behavioural responses related to fear and anxiety in this species. Previous  
459 studies have shown that sounds increase motor acceleration and startle responses in zebrafish  
460 (Neo et al., 2015; Shafiei Sabet et al., 2015). However, Shafiei Sabet et al. (2015) using an in-  
461 air speaker as a sound source reported that the difference in the number of startle response  
462 between continuous and intermittent (1:1) treatments with the ambient treatment was not  
463 significant which is not consistent with the results of this study. The reason of this difference  
464 in the occurrence of stress-related swimming behaviour could be due to differences in the  
465 background sound intensity before the test, differences in the method of ensonifying of the  
466 fish tank; the sound source (speaker) under water or in-air, different storage conditions of fish  
467 and also differences Genetics and individual characteristics in zebrafish.

468 Studies by other researchers have shown that other species of fish respond similarly to sudden  
469 swimming behaviour in response to sound exposure. European minnow (*Phoxinus phoxinus*)  
470 and sticklebacks (*Gasterosteus aculeatus*) also showed a significant increase in the number of  
471 startle response in the face of sound, which is similar to the results of this study (Purser and  
472 Radford, 2011; Voellmy et al., 2014a). Startle response at the onset of sudden sound exposure  
473 is a common behavioural feature in fish kept in captivity and in the laboratory conditions. Of  
474 course, fish in the open and natural conditions can also show behavioural responses related to  
475 fear and anxiety (Neo et al., 2016; Staaterman et al., 2020). Spiga et al. (2017) stated that

476 European seabass (*Dicentrarchus labrax*) also showed a higher number of startle response in  
477 continuous and intermittent sound treatment against ambient (control) treatment.

478 Startle response by prey fish is a behavioural response to increase survival in predator-prey  
479 relationships (Webb, 1986). By hearing the sounds of predator fish and receiving sound signals  
480 related to the attack, the prey fish starts swimming at high speed and explosively in the opposite  
481 direction of the perceived sound in order to increase the success rate of escaping and staying  
482 away from the predatory species. Sounds can affect the prey fish's decision-making power  
483 against sound sources or danger, the way in which prey assesses risk (Dukas, 2004), and the  
484 loss of focus and lack of appropriate response to danger (Chan et al., 2010; Simpson et al.,  
485 2015). It has been suggested that increasing sound levels can potentially impair the perception  
486 of danger by predatory fish species (Slabbekoorn et al., 2010). Involuntary and acquired  
487 behavioural responses related to fear and anxiety are associated with the potential for the  
488 presence of danger (Blaser et al., 2010; Maximino et al., 2010). The quality and quantity of  
489 behavioural responses of fish in captivity and in vitro to brief and severe stress stimuli are  
490 different from those of fish living in the habitat, reducing the behavioural responses in the  
491 habitat and in the wild (Malavasi et al., 2004). One of the reasons for these differences could  
492 be due to the most ability of fish to respond in the wild before reaching the stimulus threshold,  
493 so that these fish have a longer time to make decisions and escape from the danger zone by  
494 hearing and perceiving closely the sounds associated with the predator species and they have  
495 more space available than controlled laboratory environments. Another reason could be the  
496 high level of basal stress potential in controlled laboratory environments, which with additional  
497 stress due to the perception of the predator species leads to an increase and intensification of  
498 total stress in the prey species and more intense responses are shown.

499 In addition to behavioural responses, increasing sound levels can also affect physiological  
500 responses in the laboratory and in the natural habitat of fish. The study of Spiga et al. (2017)  
501 and Radford et al. (2016) showed that sound exposure had a significant effect on the number  
502 of opening and closing of gills and thus on the gill ventilation of European seabass  
503 (*Dicentrarchus labrax*) compared to the control treatment. This increase in oxygen demand by  
504 European bass (*Dicentrarchus labrax*), which is accompanied by an increase in gill ventilation  
505 and the opening and closing of gill operculum, indicates an increase in stress levels. Santulli et  
506 al. (1999) showed that blood biochemical parameters including cortisol and glucose in  
507 European seabass (*Dicentrarchus labrax*) increased in sound treatments compared to the  
508 ambient treatment. Staaterman et al. (2020) stated that anthropogenic sound treatments in the

509 natural environment also have the potential to affect stress-related physiology in coral reef fish,  
510 so that the amount of cortisol in sound treatments was significantly increased compared to the  
511 control treatment.

### 512 *5.2. Sound impacts on the behavioural tolerance in swimming activities*

513 In the experiment performed on zebrafish, different sound patterns had a significant effect on  
514 the swimming speed of the fish compared to the ambient treatment, which is consistent with  
515 the observations of the present study (Neo et al., 2015; Shafiei Sabet et al., 2015; Shafiei Sabet  
516 et al., 2016a). In the experiment of Neo et al. (2015) with a group of 5 zebrafish in each  
517 treatment, in comparison with increasing the swimming speed of fish with the ambient  
518 treatment, as in the results of this study, the intermittent (1:1) treatment had a higher mean  
519 speed and significant difference than other treatments. Also, with onset of sound exposure, a  
520 significant difference in swimming speed was observed in cod fish (*Gadus morhua*), which  
521 was consistent with the results of this study (Handegard et al., 2003). There was also a  
522 significant difference in the swimming speed of European seabass compared to the silent  
523 conditions (Neo et al., 2018). Shafiei Sabet et al. (2016b) by comparing the effect of sound on  
524 the swimming behaviour of two species of The Lake Victoria cichlids (*Haplochromis piceatus*)  
525 and zebrafish (*Danio rerio*) have showed that the application of sound treatments reduced the  
526 swimming speed of cichlids (*Haplochromis piceatus*) and increased the swimming speed of  
527 zebrafish (Shafiei Sabet et al., 2016b). The reason of the difference in the swimming speed of  
528 cichlids (*Haplochromis piceatus*) can be related to species-specific behavioural responses in  
529 response to acoustic stimuli, genetic characteristics and habitat conditions.

### 530 *5.3. The effect of sound on the spatial distribution of zebrafish (Vertical/Horizontal)*

531 Studies on the stress indices of zebrafish in the face of different sound patterns showed that  
532 with the onset of sound treatments, the spatial distribution of fish changes and the fish shows  
533 a greater tendency to swim in the lower layer of the aquarium environment. Also, the study on  
534 the percentage of fish in the lower layer of the test tank showed that in some sound treatments  
535 in the brief time there was a significant difference and in the prolonged time in all sound  
536 treatments except the ambient treatment, this means Which had a greater tendency to be present  
537 in the lower layer when playing the sound of fish. In another part of the results of this study  
538 and the study of the spatial distribution of the presence of fish in the horizontal profile (X  
539 position) also showed that in none of the sound treatments the fish did not tend to distance from  
540 the sound source and did not show significant differences.

541 Neo et al. (2015) in the study of the effect of sound on the spatial distribution of zebrafish,  
542 found that zebrafish with the beginning of broadcasting sound treatments showed startle  
543 response and increased brief swimming speed and the spatial distribution of zebrafish changed  
544 so that fish was more inclined to and they swam in the top and surface layers of the test tank.  
545 Also, in this study (Neo et al. 2015), there were no observations of the freezing and standing  
546 of the fish in the lower layer of the tank. However, the results of the present experiment in the  
547 spatial distribution of zebrafish, the percentage of time fish staying in the lower layer of the  
548 test tank was higher, which is contrary to the report of Neo et al. (2015). One of the reasons for  
549 this difference in the results of vertical spatial distribution could be the amount of sound  
550 intensity emitted in the treatments used in these two studies. The intensity of sound emitted in  
551 acoustic treatments was equal to 112 dB re 1 $\mu$  Pa, which is less than the intensity of sound in  
552 this study (121 dB 1 $\mu$  Pa). Therefore, a significant increase in sound intensity and high sound  
553 level difference between sound treatments and ambient treatments can lead to different  
554 responses in fish. In another study, Neo et al. (2018) designed an experiment to investigate the  
555 effect of different sound patterns on the behaviour of European seabass and found that  
556 anthropogenic sounds increase the swimming depth of European seabass and distance from the  
557 sound source, which results in behavioural responses is consistent with present study in lower  
558 layer results.

559 Other fishes have also shown spatial distribution changes in response to acoustic stimuli. In a  
560 field study (Kok et al., 2021) have shown that bottom-moored echosounders, representative of  
561 a high intensity impulsive intermittent anthropogenic sound, affect the abundance, schooling  
562 cohesion behaviour and swimming depth of pelagic fish. Two recent telemetry tagging studies  
563 demonstrated the effects of another intermittent source of sound, seismic surveys, on free-  
564 ranging benthic fish species. Bruce et al. (2018) showed shift of diurnal activity patterns and  
565 general swimming speed in eight tiger flatheads (*Neoplatycephalus richardsoni*). van der  
566 Knaap et al. (2021) revealed .....

567 The swimming of zebrafish towards the upper layer at the beginning of the sound transmission  
568 has been interpreted as curiosity and searching behaviour, as the authors' experimental  
569 observations have shown that by opening the door of the zebrafish test saloon and walking the  
570 staff to perform feeding fish usually produce low-pitched sounds, which attract the attention  
571 and curiosity of zebrafish and show the highest distribution at the water column level for  
572 feeding activities (Shafiei Sabet et al., 2015), However, the response of changing the spatial  
573 distribution of fish to the depth and lower layer with the beginning of sound treatments

574 indicates the occurrence of stress and fear in fish, which is similar and expressed in studies of  
575 other researchers on other fish species (Neo et al., 2018; Sarà et al., 2007). Examination of fish  
576 behaviour to other stimuli including chemicals and fear extract has also shown that with the  
577 release of chemicals and fear extract, fish move to the lower layer (deep) column and this  
578 pattern of spatial distribution is a behavioural indicator of fear in many interpreted fish species  
579 (Gerlai et al., 2000; Gerlai et al., 2006).

580 In addition, another reason for the difference in the vertical distribution behavioural results  
581 observed in the study of Neo et al. (2015) and the present study could be the difference in the  
582 use of speakers, such as the use of in air speaker in the previous study (Neo et al., 2015) and  
583 the use of underwater speaker in the present study. The use of speakers in air to broadcast sound  
584 treatments leads to the production of more sound intensity in the deeper parts than in the middle  
585 and the surface of the water in the aquarium tank, which may cause the fish to move and escape  
586 towards the upper and surface layer where less sound intensity is felt (Shafiei Sabet et al.,  
587 2015).

588 In the study of Shafiei Sabet et al. (2015), they investigated the effect of acoustic treatments  
589 with sound intensity almost similar to this study (122 dB re 1 $\mu$  Pa) on the spatial distribution  
590 of zebrafish showed that it is not consistent with the present study. The reason for this  
591 difference in spatial distribution behavioural response could be the use of in air speaker in the  
592 study by Shafiei Sabet et al. (2015) and underwater speaker in this study, as well as the  
593 complexity of sound distribution patterns and sound gradients in aquarium environments  
594 (Campbell et al., 2019) and other factors include the size of the test tank, the life cycle and  
595 location of the fish storage tank, as well as differences in the species and genetics of the fish  
596 species. Also in the study of Shafiei Sabet et al. (2015) in the spatial distribution of fish  
597 horizontally, a similar result was shown with the results of the present study and no significant  
598 difference was observed in the x position.

599 According to the available sources for measuring sound intensity and scattering patterns in  
600 aquarium environments, an experiment was designed by Parvulescu (1967) and Akamatsu et  
601 al. (2002) which shows the complexity and variability of sound scattering patterns and sound  
602 gradients in enclosed aquarium tank environments. This fact indicates the limitations of  
603 studying the spatial distribution of aquatic animals in enclosed and controlled environments  
604 that must be considered. Therefore, in order to study the distribution patterns of fish and other  
605 aquatic species more accurately, it is recommended to conduct field studies in natural

606 environments of animal species in order to obtain a more accurate and complete understanding  
607 of the manner and patterns of sound-dependent distribution in aquatic species.

#### 608 *5.4. The importance of particle motion in fish tanks; behavioural observations for future works*

609 In order to understand the behavioural changes of zebrafish in response to sound, first of all, it  
610 is very important to understand how the species detects and processes, and how it behaviourally  
611 responds to sound (Hawkins and Popper, 2020). Because the auditory system of fishes evolved  
612 primarily to detect particle motion, many fishes are most sensitive to particle motion and they  
613 can use it to determine the direction of a sound source (Hawkins and Popper, 2018; Popper and  
614 Hawkins, 2018; Sand and Bleckmann, 2008; Sisneros and Rogers, 2016). Only some of them,  
615 including the zebrafish, are sensitive to sound pressure as well as the particle motion (Popper  
616 and Fay, 2011; Popper and Hawkins, 2018). There are some studies revealing directional  
617 hearing and sound source localization in fish under laboratory conditions and in free sound  
618 fields. Schuijf (1975) proposed that the cod determined sound direction by monitoring the  
619 particle motion of the sound field, presumably employing the directional orientation of the  
620 inner ear sensory cells (Dale, 1976). Although, Schuijf (1975) also concluded that the direction  
621 of only particle motion may be insufficient to determine the direction of a sound source. It has  
622 already been shown that cod could discriminate between signals coming towards the head as  
623 compared to those coming towards the tail (Buwalda et al., 1983; Schuijf and Buwalda, 1975).  
624 They argued that directional hearing might involve both comparing the responses of hear cells  
625 oriented in different directions and also analysis of the phase relationship between the sound  
626 pressure and particle motion to eliminate any remaining 180<sup>0</sup> ambiguities (Schuijf, 1976).

#### 627 *5.5. How important it is particle motion to fishes and invertebrates*

628 We did not mention the levels and direction of the particle motion that is generated within the  
629 fish tank. Therefore, we believe it is premature to conclude that zebrafish cannot localize sound  
630 source in our experimental set up. One might be because we know very little about hearing in  
631 fishes only over 120 species of the more than 33000 known fish species (Ladich and Fay, 2013)  
632 and that the empirical and theoretical work on sound source localization and directional hearing  
633 in fishes have been contradictory and obscure for decades (Sisneros and Rogers, 2016).  
634 Moreover, some explanations would be that practically because it is difficult to monitor particle  
635 motion in fish tank, the lack of easily used and reasonably priced instrumentation to measure  
636 particle motion, lack of sound exposure criteria for particle motion and finally lack of particle  
637 motion measurement standards (Popper et al., 2014).



638 Within an aquarium tank the levels of particle motion are often highest at the water surface,  
639 and close to the tank walls, when an underwater loudspeaker is used (Jones et al., 2019).  
640 Although, resonant frequencies and reverberation may influence propagation and spectro-  
641 temporal structure of received acoustic stimuli in fish ranks (Jones et al., 2019). Our fish moved  
642 towards the lower levels of the tank, which may be because the particle motion levels were  
643 highest close to the water surface, and lower at the bottom of the tank. It is always important  
644 to monitor the particle motion when examining the effects of sounds upon fishes and  
645 invertebrates (Nedelec et al., 2016; Popper and Hawkins, 2018). Moreover, Invertebrates are  
646 especially sensitive to substrate vibration (Aimon et al., 2021; Hawkins et al., 2021; Morley et  
647 al., 2014; Roberts et al., 2016), and some fish are too. Particle motion measurement may play  
648 an important role in answering crucial biological and ecological questions relating to fishes and  
649 other species among taxa (Nedelec et al., 2016). Thus, in doing future experiments to explore  
650 anthropogenic sound impacts on the behaviour of fishes or invertebrates under laboratory  
651 conditions it is necessary to develop open source and accessible protocols for monitor both  
652 particle motion on three axes and sound pressure.

#### 653 *5.6. Acoustic stimuli trigger foraging performance modifications negatively in zebrafish*

654 In the present study, the parameters of fish foraging behaviour such as food discrimination  
655 error and food handling error were examined. The results of this experiment showed that the  
656 zebrafish did not show any significant difference in the food discrimination error when exposed  
657 to sound treatments compared to the ambient treatment. Also, the results of food handling error  
658 showed that all sound treatments showed a significant difference compared to the ambient  
659 treatment, but these sound treatments did not show a significant difference compared to each  
660 other. Here we confirmed our earlier findings (Shafiei Sabet et al., 2015) that sound impacts  
661 may goes beyond single species. Experimental sound exposure causes more food handling  
662 errors and foraging in zebrafish as predator, which led to more survival in waterflea as prey  
663 and avoiding from being eaten by a predator in noisy conditions.

664 In a study by Purser and Radford (2011), they found that the boadcasting of sound treatments  
665 significantly affected the foraging performance of stickleback and food discrimination error  
666 and food handling error increased significantly compared to the ambient treatment and reduced  
667 foraging performance, which in the food discrimination error, it is not consistent with the  
668 results of the present experiment, and one of the reasons for this difference is the difference in  
669 the physiology of fish and its diet. Also, the possible difference in the physiology of fish visual

670 sense can be one of the factors influencing these differences, but in the food handling error, a  
671 similar result was observed with the results of the present experiment.

672 In other studies, by Voellmy et al. (2014b), the results showed a significant difference in the  
673 number of unsuccessful takes of *Daphnia* in stickleback and no significant difference in  
674 minnow fish, which can generally indicate the physiological difference between the two species  
675 and possibly the difference in visual sense between the two species. The minnow fish, which  
676 belongs to the Ciprinidae family which similar to zebrafish family, did not show a significant  
677 difference in the unsuccessful takes of *Daphnia*, but in another species, a significant difference  
678 was observed.

679 In a study almost similar to the present experiment, Shafiei Sabet et al. (2015) designed an  
680 experiment to investigate the effect of different sound patterns on the swimming and foraging  
681 behaviour of zebrafish and found that the application of sound treatments caused a significant  
682 difference in fish handling error. There was no significant difference in food discrimination  
683 error that was consistent with the results of this experiment. Sound playback can be effective  
684 in identifying a substance as food and making decisions and attacking it. Since zebrafish are  
685 among the fish that have strong visual sense and use this sense to catch and hunt, so sounds  
686 can affect the ability to perceive potential vision.

## 687 **6. Conclusion**

688 The results of this study highlighted impacts of acoustic stimuli on a freshwater fish species  
689 and confirmed our earlier study on the same fish species (zebrafish) under laboratory  
690 conditions. Our findings show that the parameters of zebrafish swimming and foraging  
691 behaviour in different sound patterns were significantly different compared to control or  
692 ambient treatment. The results showed that sound treatments compared to the ambient  
693 treatment caused a significant difference in the parameters of swimming behaviour including  
694 the number of startle response, swimming speed of fish in the brief and prolonged time, spatial  
695 distribution of fish in vertical and horizontal profiles. In general, the observed behavioural  
696 patterns in response to sound treatments as a stressor, especially in the brief time of this study  
697 have been observed in natural environments and in other fish species. Sound pollution as a  
698 stressor in the brief and prolonged time can cause behavioural changes and disturbances in the  
699 individual levels of aquatic species and have broad and important repercussions on the  
700 communities of an ecosystem.

701 Also, the results obtained in the foraging behaviour showed that different sound patterns in  
702 comparison with the ambient treatment caused a significant difference in food handling error  
703 but no significant difference was observed in food discrimination error. Depending on the  
704 species characteristics, these behavioural responses include escaping the predator species,  
705 hiding in a shelter to avoid being hunted, forming crowded clusters, and even approaching the  
706 predator species aggressively. The movement towards the lower layer observed in the  
707 experimental tank by zebrafish can be due to the stress caused by the potential for the presence  
708 of a predatory species, that in their natural habitats, where clear water is permeable to light, to  
709 the deeper parts of their habitat, which have less light and have vegetation that reduces the  
710 visibility of the predator species, and thus ensure its survival. In general, due to the  
711 simultaneous presence of the species used in this experiment in their main habitat (zebrafish,  
712 daphnia and duckweed) and the results obtained can be understood that sound causes overlap  
713 in the water particles motion, which is one of the factors in the perception of the prey species  
714 by the predator species, and the zebrafish cannot have a proper understanding of the presence  
715 of the prey species. On the other hand, creating a state of distress and anxiety after playing  
716 sound treatments has caused a lack of proper vision of the prey species and the zebrafish, which  
717 is an omnivorous and visually impaired fish in prey, cannot see and hunt well.

718 Increased background sound levels by human activities can be recognized as a stressor and lead  
719 to a series of changes in the activities and swimming patterns of aquatic species. It should be  
720 noted that the results of this study are obtained in captivity and under laboratory conditions  
721 therefore the interpretation of the results should be done with caution and attention on the  
722 conditions of natural environments in the various habitat and behavioural limitations of any  
723 species.

#### 724 **Funding:**

725 This work was funded by the Iranian Ministry of Science, Research and Technology,  
726 University of Guilan with the grant number 971511210004.

#### 727 **Credit author statement**

728 Reza Mohsenpour: Conceptualization, Methodology, Software, Formal analysis, Supervision,  
729 Visualization, Data curation, writing - original draft.

730 Saeed Shafiei Sabet: Conceptualization, Methodology, Supervision, Project administration,  
731 Writing - review & editing.

732

733 **Data accessibility:**

734 All data used for the analyses reported in this article and some videos are available from the  
735 figshare. Moreover, the data and some videos that support the findings of this article are  
736 available from the first author upon request.

737 **Declaration of competing interest**

738 The authors declare that they have no known competing financial interests or personal  
739 relationships that could have appeared to influence the work reported in this paper.

740 **Acknowledgments:**

741 Thanks to Jeroen Hubert and Ozkan Sertlek for their guide and advice on hydrophone  
742 calibrations, editing R script versions and acoustic measurements. Special tanks to Hans  
743 Slabbekoorn for providing accessibility to acoustic measurement devices. We also thank Narjes  
744 Karimi for helping us in reviewing the results and graphs.

745 **References:**

746 Aimon, C., Simpson, S.D., Hazelwood, R.A., Bruintjes, R., Urbina, M.A., 2021. Anthropogenic  
747 underwater vibrations are sensed and stressful for the shore crab *Carcinus maenas*. *Environmental*  
748 *Pollution* 285, 117148.  
749 Akamatsu, T., Okumura, T., Novarini, N., Yan, H.Y., 2002. Empirical refinements applicable to the  
750 recording of fish sounds in small tanks. *The Journal of the Acoustical Society of America* 112, 3073-  
751 3082.  
752 Altshuler, I., Demiri, B., Xu, S., Constantin, A., Yan, N.D., Cristescu, M.E., 2011. An integrated multi-  
753 disciplinary approach for studying multiple stressors in freshwater ecosystems: *Daphnia* as a model  
754 organism. *Integrative and comparative biology* 51, 623-633.  
755 Amorim, M.C.P., Vasconcelos, R.O., Fonseca, P.J., 2015. Fish sounds and mate choice, *Sound*  
756 *communication in fishes*. Springer, pp. 1-33.  
757 André, M., Solé, M., Lenoir, M., Durfort, M., Quero, C., Mas, A., Lombarte, A., Van Der Schaar, M.,  
758 López-Bejar, M., Morell, M., 2011. Low-frequency sounds induce acoustic trauma in cephalopods.  
759 *Frontiers in Ecology and the Environment* 9, 489-493.  
760 Barber, J.R., Fristrup, K.M., Brown, C.L., Hardy, A.R., Angeloni, L.M., Crooks, K.R., 2009. Conserving the  
761 wild life therein: Protecting park fauna from anthropogenic noise. 26, 26-31.  
762 Bermúdez-Cuamatzin, E., López-Hernández, M., Campbell, J., Zuria, I., Slabbekoorn, H., 2018. The role  
763 of singing style in song adjustments to fluctuating sound conditions: a comparative study on Mexican  
764 birds. *Behavioural processes* 157, 645-655.  
765 Blaser, R., Chadwick, L., McGinnis, G., 2010. Behavioral measures of anxiety in zebrafish (*Danio rerio*).  
766 *Behavioural brain research* 208, 56-62.  
767 Bracciali, C., Campobello, D., Giacoma, C., Sara, G., 2012. Effects of nautical traffic and noise on  
768 foraging patterns of Mediterranean damselfish (*Chromis chromis*). *PloS one* 7, e40582.

- 769 Bruce, B., Bradford, R., Foster, S., Lee, K., Lansdell, M., Cooper, S., Przeslawski, R., 2018. Quantifying  
770 fish behaviour and commercial catch rates in relation to a marine seismic survey. *Marine*  
771 *environmental research* 140, 18-30.
- 772 Budelmann, B.-U., 2011. Morphological diversity of equilibrium receptor systems in aquatic  
773 invertebrates, *Sensory biology of aquatic animals*. Springer, pp. 757-782.
- 774 Buwalda, R., Schuijff, A., Hawkins, A., 1983. Discrimination by the cod of sounds from opposing  
775 directions. *Journal of Comparative Physiology* 150, 175-184.
- 776 Cachat, J., Canavello, P., Elegante, M., Bartels, B., Hart, P., Bergner, C., Egan, R., Duncan, A., Tien, D.,  
777 Chung, A., 2010. Modeling withdrawal syndrome in zebrafish. *Behavioural brain research* 208, 371-  
778 376.
- 779 Campbell, J., Shafiei Sabet, S., Slabbekoorn, H., 2019. Particle motion and sound pressure in fish tanks:  
780 a behavioural exploration of acoustic sensitivity in the zebrafish. *Behavioural processes* 164, 38-47.
- 781 Carroll, A., Przeslawski, R., Duncan, A., Gunning, M., Bruce, B., 2017. A critical review of the potential  
782 impacts of marine seismic surveys on fish & invertebrates. *Marine Pollution Bulletin* 114, 9-24.
- 783 Casper, B.M., Smith, M.E., Halvorsen, M.B., Sun, H., Carlson, T.J., Popper, A.N., 2013. Effects of  
784 exposure to pile driving sounds on fish inner ear tissues. *Comparative Biochemistry and Physiology*  
785 *Part A: Molecular & Integrative Physiology* 166, 352-360.
- 786 Chan, A.A.Y.-H., Giraldo-Perez, P., Smith, S., Blumstein, D.T., 2010. Anthropogenic noise affects risk  
787 assessment and attention: the distracted prey hypothesis. *Biology letters* 6, 458-461.
- 788 Coquereau, L., Grall, J., Chauvaud, L., Gervaise, C., Clavier, J., Jolivet, A., Di Iorio, L., 2016. Sound  
789 production and associated behaviours of benthic invertebrates from a coastal habitat in the north-  
790 east Atlantic. *Marine biology* 163, 127.
- 791 Cortemeglia, C., Beitinger, T.L., 2005. Temperature tolerances of wild-type and red transgenic zebra  
792 danios. *Transactions of the American Fisheries Society* 134, 1431-1437.
- 793 Crawford, A.D., Esguerra, C.V., de Witte, P.A., 2008. Fishing for drugs from nature: zebrafish as a  
794 technology platform for natural product discovery. *Planta medica* 74, 624-632.
- 795 Dale, T., 1976. THE LABYRINTHINE MECHANORECEPTOR ORGANS OF THE COD GADUS MORHUA L-  
796 (TELEOSTEI: GADIDAE). A SCANNING ELECTRON MICROSCOPICAL STUDY, WITH SPECIAL REFERENCE  
797 TO THE MORPHOLOGICAL POLARIZATION OF THE MACULAR SENSORY CELLS.
- 798 de Jong, K., Amorim, M., Fonseca, P.J., Heubel, K.U., 2018a. Noise affects multimodal communication  
799 during courtship in a marine fish. *Frontiers in Ecology and Evolution* 6, 113.
- 800 De Jong, K., Amorim, M.C.P., Fonseca, P.J., Fox, C.J., Heubel, K.U., 2018b. Noise can affect acoustic  
801 communication and subsequent spawning success in fish. *Environmental Pollution* 237, 814-823.
- 802 de Vincenzi, G., Micarelli, P., Viola, S., Buffa, G., Sciacca, V., Maccarrone, V., Corrias, V., Reinerio, F. R.,  
803 Giacomini, C., Filiciotto, F., 2021. Biological Sound vs. Anthropogenic Noise: Assessment of Behavioural  
804 Changes in *Scyliorhinus canicula* Exposed to Boats Noise. *Animals* 11, 174.
- 805 Deakin, A.G., Spencer, J.W., Cossins, A.R., Young, I.S., Sneddon, L.U., 2019. Welfare challenges  
806 influence the complexity of movement: fractal analysis of behaviour in zebrafish. *Fishes* 4, 8.
- 807 Detrich, H.W., Detrich III, H.W., Westerfield, M., Zon, L.I., 2011. *The zebrafish: genetics, genomics and*  
808 *informatics*. Academic Press.
- 809 Detrich, H.W., Westerfield, M., Zon, L.I., 2004. *The zebrafish: Biology*. ACADEMIC PRESS.
- 810 Dukas, R., 2004. Causes and consequences of limited attention. *Brain, Behavior and Evolution* 63, 197-  
811 210.
- 812 Eaton, R.C., Bombardieri, R.A., Meyer, D.L., 1977. The Mauthner-initiated startle response in teleost  
813 fish. *Journal of Experimental Biology* 66, 65-81.
- 814 Eaton, R.C., Didomenico, R., Nissano, J., 1991. Role of the Mauthner cell in sensorimotor integration  
815 by the brain stem escape network. *Brain, Behavior and Evolution* 37, 272-285.
- 816 Ebert, D., 2005. *Ecology, epidemiology, and evolution of parasitism in Daphnia*. National Library of  
817 *Medicine*.
- 818 Ebert, D., 2008. Host-parasite coevolution: insights from the *Daphnia*-parasite model system. *Current*  
819 *opinion in microbiology* 11, 290-301.

- 820 Egan, R.J., Bergner, C.L., Hart, P.C., Cachat, J.M., Canavello, P.R., Elegante, M.F., Elkhayat, S.I., Bartels,  
821 B.K., Tien, A.K., Tien, D.H., 2009. Understanding behavioral and physiological phenotypes of stress and  
822 anxiety in zebrafish. *Behavioural brain research* 205, 38-44.
- 823 Erbe, C., Dunlop, R., Dolman, S., 2018. Effects of noise on marine mammals, Effects of anthropogenic  
824 noise on animals. Springer, pp. 277-309.
- 825 Fedoroff, K.J., 2021. SOUND BITES: THE IMPACT OF BOAT NOISE ON FRESHWATER FISH. University of  
826 Saskatchewan.
- 827 Gerhard, G.S., Kauffman, E.J., Wang, X., Stewart, R., Moore, J.L., Kasales, C.J., Demidenko, E., Cheng,  
828 K.C., 2002. Life spans and senescent phenotypes in two strains of Zebrafish (*Danio rerio*). *Experimental*  
829 *gerontology* 37, 1055-1068.
- 830 Gerlai, R., 2019. Reproducibility and replicability in zebrafish behavioral neuroscience research.  
831 *Pharmacology Biochemistry and Behavior* 178, 30-38.
- 832 Gerlai, R., Lahav, M., Guo, S., Rosenthal, A., 2000. Drinks like a fish: zebra fish (*Danio rerio*) as a  
833 behavior genetic model to study alcohol effects. *Pharmacology Biochemistry and Behavior* 67, 773-  
834 782.
- 835 Gerlai, R., Lee, V., Blaser, R., 2006. Effects of acute and chronic ethanol exposure on the behavior of  
836 adult zebrafish (*Danio rerio*). *Pharmacology Biochemistry and Behavior* 85, 752-761.
- 837 Graham, A.L., Cooke, S.J., 2008. The effects of noise disturbance from various recreational boating  
838 activities common to inland waters on the cardiac physiology of a freshwater fish, the largemouth bass  
839 (*Micropterus salmoides*). *Aquatic Conservation: Marine and Freshwater Ecosystems* 18, 1315-1324.
- 840 Green, R.E., Langston, R.H., McCluskie, A., Sutherland, R., Wilson, J.D., 2016. Lack of sound science in  
841 assessing wind farm impacts on seabirds. *Journal of Applied Ecology* 53, 1635-1641.
- 842 Halvorsen, M.B., Casper, B.M., Matthews, F., Carlson, T.J., Popper, A.N., 2012. Effects of exposure to  
843 pile-driving sounds on the lake sturgeon, Nile tilapia and hogchoker. *Proceedings of the Royal Society*  
844 *B: Biological Sciences* 279, 4705-4714.
- 845 Hanache, P., Spataro, T., Firmat, C., Boyer, N., Fonseca, P., Médoc, V., 2020. Noise-induced reduction  
846 in the attack rate of a planktivorous freshwater fish revealed by functional response analysis.  
847 *Freshwater Biology* 65, 75-85.
- 848 Handegard, N.O., Michalsen, K., Tjøstheim, D., 2003. Avoidance behaviour in cod (*Gadus morhua*) to  
849 a bottom-trawling vessel. *Aquatic Living Resources* 16, 265-270.
- 850 Hansen, K.A., Hernandez, A., Mooney, T.A., Rasmussen, M.H., Sørensen, K., Wahlberg, M., 2020. The  
851 common murre (*Uria aalge*), an auk seabird, reacts to underwater sound. *J. Acoust. Soc. Am* 147, 4069-  
852 4074.
- 853 Harris, K.D., Bartlett, N.J., Lloyd, V.K., 2012. *Daphnia* as an emerging epigenetic model organism.  
854 *Genetics research international* 2012.
- 855 Hastings, M.C., Popper, A.N., 2005. Effects of sound on fish. California Department of Transportation.
- 856 Hawkins, A., Myrberg, A., 1983. Hearing and sound communication under water. *Bioacoustics*, a  
857 comparative approach. Academic Press, London, 347-405.
- 858 Hawkins, A.D., 1986. Underwater sound and fish behaviour, *The behaviour of teleost fishes*. Springer,  
859 pp. 114-151.
- 860 Hawkins, A.D., Hazelwood, R.A., Popper, A.N., Macey, P.C., 2021. Substrate vibrations and their  
861 potential effects upon fishes and invertebrates. *The Journal of the Acoustical Society of America* 149,  
862 2782-2790.
- 863 Hawkins, A.D., Picciulin, M., 2019. The importance of underwater sounds to gadoid fishes. *The Journal*  
864 *of the Acoustical Society of America* 146, 3536-3551.
- 865 Hawkins, A.D., Popper, A.N., 2018. Directional hearing and sound source localization by fishes. *The*  
866 *Journal of the Acoustical Society of America* 144, 3329-3350.
- 867 Hawkins, A.D., Popper, A.N., 2020. Sound detection by Atlantic cod: An overview. *The Journal of the*  
868 *Acoustical Society of America* 148, 3027-3041.

- 869 Heath, V.L., Miehl, S., Johnson, N., Higgs, D.M., 2021. Behavioural response of sea lamprey  
870 (*Petromyzon marinus*) to acoustic stimuli in a small stream. *Canadian Journal of Fisheries and Aquatic*  
871 *Sciences* 78, 341-348.
- 872 Higgs, D.M., Souza, M.J., Wilkins, H.R., Presson, J.C., Popper, A.N., 2002. Age- and size-related changes  
873 in the inner ear and hearing ability of the adult zebrafish (*Danio rerio*). *JARO: Journal of the Association*  
874 *for Research in Otolaryngology* 3, 174.
- 875 Hubert, J., van Bemmelen, J., Slabbekoorn, H., 2021. No negative effects of boat sound playbacks on  
876 olfactory-mediated food finding behaviour of shore crabs in a T-maze. *Environmental Pollution* 270,  
877 116184.
- 878 Injaian, A.S., Francis, C.D., Ouyang, J.Q., Dominoni, D.M., Donald, J.W., Fuxjager, M.J., Goymann, W.,  
879 Hau, M., Husak, J.F., Johnson, M.A., 2020. Baseline and stress-induced corticosterone levels across  
880 birds and reptiles do not reflect urbanization levels. *Conservation Physiology* 8, 1.
- 881 Johansson, K., Sigray, P., Backström, T., Magnhagen, C., 2016. Stress response and habituation to  
882 motorboat noise in two coastal fish species in the Bothnian Sea, The effects of noise on aquatic life II.  
883 Springer, pp. 513-521.
- 884 Jones, I.T., Stanley, J.A., Bonnel, J., Mooney, T.A., 2019. Complexities of tank acoustics warrant direct,  
885 careful measurement of particle motion and pressure for bioacoustic studies, *Proceedings of Meetings*  
886 *on Acoustics 5ENAL*. Acoustical Society of America, p. 010005.
- 887 Kalueff, A.V., Cachat, J.M., 2011. Zebrafish neurobehavioral protocols.
- 888 Keevin, T.M., Hempen, G.L., 1997. The environmental effects of underwater explosions with methods  
889 to mitigate impacts. CORPS OF ENGINEERING ST LOUIS MOST LOUIS DISTRICT.
- 890 Kok, A.C., Bruil, L., Berges, B., Sakinan, S., Debusschere, E., Reubens, J., de Haan, D., Norro, A.,  
891 Slabbekoorn, H., 2021. An echosounder view on the potential effects of impulsive noise pollution on  
892 pelagic fish around windfarms in the North Sea. *Environmental Pollution*, 118063.
- 893 Kunc, H.P., McLaughlin, K.E., Schmidt, R., 2016. Aquatic noise pollution: implications for individuals,  
894 populations, and ecosystems. *Proceedings of the Royal Society B: Biological Sciences* 283, 20160839.
- 895 Ladich, F., Fay, R.R., 2013. Auditory evoked potential audiometry in fish. *Reviews in Fish Biology and*  
896 *Fisheries* 23, 317-364.
- 897 Lieschke, G.J., Oates, A.C., Kawakami, K., 2009. Zebrafish: methods and protocols. Springer.
- 898 Malavasi, S., Georgalas, V., Lugli, M., Torricelli, P., Mainardi, D., 2004. Differences in the pattern of  
899 antipredator behaviour between hatchery-reared and wild European sea bass juveniles. *Journal of fish*  
900 *biology* 65, 143-155.
- 901 Maximino, C., de Brito, T.M., da Silva Batista, A.W., Herculano, A.M., Morato, S., Gouveia Jr, A., 2010.  
902 Measuring anxiety in zebrafish: a critical review. *Behavioural brain research* 214, 157-171.
- 903 McCauley, R.D., Fewtrell, J., Popper, A.N., 2003. High intensity anthropogenic sound damages fish  
904 ears. *The Journal of the Acoustical Society of America* 113, 638-642.
- 905 McCloskey, K.P., Chapman, K.E., Chapuis, L., McCormick, M.I., Radford, A.N., Simpson, S.D., 2020.  
906 Assessing and mitigating impacts of motorboat noise on nesting damselfish. *Environmental Pollution*  
907 266, 115376.
- 908 McDonald, M.A., Hildebrand, J.A., Wiggins, S.M., 2006. Increases in deep ocean ambient noise in the  
909 Northeast Pacific west of San Nicolas Island, California. *The Journal of the Acoustical Society of*  
910 *America* 120, 711-718.
- 911 Mickle, M.F., Higgs, D.M., 2018. Integrating techniques: a review of the effects of anthropogenic noise  
912 on freshwater fish. *Canadian Journal of Fisheries and Aquatic Sciences* 75, 1534-1541.
- 913 Mills, S.C., Beldade, R., Henry, L., Laverty, D., Nedelec, S.L., Simpson, S.D., Radford, A.N., 2020.  
914 Hormonal and behavioural effects of motorboat noise on wild coral reef fish. *Environmental Pollution*  
915 262, 114250.
- 916 Miner, B.E., De Meester, L., Pfrender, M.E., Lampert, W., Hairston Jr, N.G., 2012. Linking genes to  
917 communities and ecosystems: *Daphnia* as an ecogenomic model. *Proceedings of the Royal Society B:*  
918 *Biological Sciences* 279, 1873-1882.

- 919 Mirjany, M., Preuss, T., Faber, D.S., 2011. Role of the lateral line mechanosensory system in  
920 directionality of goldfish auditory evoked escape response. *Journal of Experimental Biology* 214, 3358-  
921 3367.
- 922 Moore, S.E., Reeves, R.R., Southall, B.L., Ragen, T.J., Suydam, R.S., Clark, C.W., 2012. A new framework  
923 for assessing the effects of anthropogenic sound on marine mammals in a rapidly changing Arctic.  
924 *BioScience* 62, 289-295.
- 925 Morley, E.L., Jones, G., Radford, A.N., 2014. The importance of invertebrates when considering the  
926 impacts of anthropogenic noise. *Proceedings of the Royal Society B: Biological Sciences* 281,  
927 20132683.
- 928 Mortensen, L.O., Chudzinska, M.E., Slabbekoorn, H., Thomsen, F., 2021. Agent-based models to  
929 investigate sound impact on marine animals: bridging the gap between effects on individual behaviour  
930 and population level consequences. *Oikos*.
- 931 Murchy, K.A., Davies, H., Shafer, H., Cox, K., Nikolich, K., Juanes, F., 2019. Impacts of noise on the  
932 behavior and physiology of marine invertebrates: A meta-analysis, *Proceedings of Meetings on*  
933 *Acoustics 5ENAL*. Acoustical Society of America, p. 040002.
- 934 Nedelec, S.L., Campbell, J., Radford, A.N., Simpson, S.D., Merchant, N.D., 2016. Particle motion: the  
935 missing link in underwater acoustic ecology. *Methods in Ecology and Evolution* 7, 836-842.
- 936 Neo, Y., Hubert, J., Bolle, L., Winter, H., Slabbekoorn, H., 2018. European seabass respond more  
937 strongly to noise exposure at night and habituate over repeated trials of sound exposure.  
938 *Environmental Pollution* 239, 367-374.
- 939 Neo, Y., Hubert, J., Bolle, L., Winter, H.V., Ten Cate, C., Slabbekoorn, H., 2016. Sound exposure changes  
940 European seabass behaviour in a large outdoor floating pen: Effects of temporal structure and a ramp-  
941 up procedure. *Environmental Pollution* 214, 26-34.
- 942 Neo, Y.Y., Parie, L., Bakker, F., Snelderwaard, P., Tudorache, C., Schaaf, M., Slabbekoorn, H., 2015.  
943 Behavioral changes in response to sound exposure and no spatial avoidance of noisy conditions in  
944 captive zebrafish. *Frontiers in behavioral neuroscience* 9, 28.
- 945 Nichols, T.A., Anderson, T.W., Širović, A., 2015. Intermittent noise induces physiological stress in a  
946 coastal marine fish. *PloS one* 10, e0139157.
- 947 Normandeau Associates, I., 2012. Effects of Noise on Fish, Fisheries, and Invertebrates in the U.S.  
948 Atlantic and Arctic from Energy Industry Sound-Generating Activities., in: Interior, A.L.S.f.t.U.S.D.o.t.  
949 (Ed.), p. 135.
- 950 Parejko, K., Dodson, S.I., 1991. The evolutionary ecology of an antipredator reaction norm: *Daphnia*  
951 *pulex* and *Chaoborus americanus*. *Evolution* 45, 1665-1674.
- 952 Parvulescu, A., 1967. The acoustics of small tanks. *Marine Bio Acoustics* 2, 7-13.
- 953 Payne, N.L., van der Meulen, D.E., Suthers, I.M., Gray, C.A., Taylor, M.D., 2015. Foraging intensity of  
954 wild mullet *Argyrosomus japonicus* decreases with increasing anthropogenic disturbance. *Marine*  
955 *biology* 162, 539-546.
- 956 Peng, C., Zhao, X., Liu, G., 2015. Noise in the sea and its impacts on marine organisms. *International*  
957 *journal of environmental research and public health* 12, 12304-12323.
- 958 Pieniasek, R.H., Mickle, M.F., Higgs, D.M., 2020. Comparative analysis of noise effects on wild and  
959 captive freshwater fish behaviour. *Animal Behaviour* 168, 129-135.
- 960 Popper, A.N., Carlson, T.J., 1998. Application of sound and other stimuli to control fish behavior.  
961 *Transactions of the American Fisheries Society* 127, 673-707.
- 962 Popper, A.N., Fay, R.R., 2011. Rethinking sound detection by fishes. *Hearing research* 273, 25-36.
- 963 Popper, A.N., Fewtrell, J., Smith, M.E., McCauley, R.D., 2003. Anthropogenic sound: effects on the  
964 behavior and physiology of fishes. *Marine Technology Society Journal* 37, 35-40.
- 965 Popper, A.N., Halvorsen, M.B., Kane, A., Miller, D.L., Smith, M.E., Song, J., Stein, P., Wysocki, L.E., 2007.  
966 The effects of high-intensity, low-frequency active sonar on rainbow trout. *The Journal of the*  
967 *Acoustical Society of America* 122, 623-635.
- 968 Popper, A.N., Hawkins, A.D., 2018. The importance of particle motion to fishes and invertebrates. *The*  
969 *Journal of the Acoustical Society of America* 143, 470-488.



- 970 Popper, A.N., Hawkins, A.D., 2019. An overview of fish bioacoustics and the impacts of anthropogenic  
971 sounds on fishes. *Journal of fish biology* 94, 692-713.
- 972 Popper, A.N., Hawkins, A.D., Fay, R.R., Mann, D.A., Bartol, S., Carlson, T.J., Coombs, S., Ellison, W.T.,  
973 Gentry, R.L., Halvorsen, M.B., 2014. Sound exposure guidelines, ASA S3/SC1. 4 TR-2014 Sound  
974 Exposure Guidelines for Fishes and Sea Turtles: A Technical Report prepared by ANSI-Accredited  
975 Standards Committee S3/SC1 and registered with ANSI. Springer, pp. 33-51.
- 976 Popper, A.N., Hawkins, A.D., Sand, O., Sisneros, J.A., 2019. Examining the hearing abilities of fishes.  
977 *The Journal of the Acoustical Society of America* 146, 948-955.
- 978 Popper, A.N., Hawkins, A.D., Thomsen, F., 2020. Taking the animals' perspective regarding  
979 anthropogenic underwater sound. *Trends in ecology & evolution* 35, 787-794.
- 980 Popper, A.N., Smith, M.E., Cott, P.A., Hanna, B.W., MacGillivray, A.O., Austin, M.E., Mann, D.A., 2005.  
981 Effects of exposure to seismic airgun use on hearing of three fish species. *The Journal of the Acoustical*  
982 *Society of America* 117, 3958-3971.
- 983 Purser, J., Radford, A.N., 2011. Acoustic noise induces attention shifts and reduces foraging  
984 performance in three-spined sticklebacks (*Gasterosteus aculeatus*). *PloS one* 6, e17478.
- 985 Radford, A.N., Lèbre, L., Lecaillon, G., Nedelec, S.L., Simpson, S.D., 2016. Repeated exposure reduces  
986 the response to impulsive noise in European seabass. *Global change biology* 22, 3349-3360.
- 987 Radford, C.A., Jeffs, A.G., Montgomery, J.C., 2008. Orientated swimming behaviour of crab postlarvae  
988 in response to reef sound. *Bioacoustics* 17, 87-89.
- 989 Reynolds, C., 2011. *Daphnia: Development of Model Organism in Ecology and Evolution-2011*.  
990 *Freshwater Reviews* 4, 85-87.
- 991 Roberts, L., Harding, H.R., Voellmy, I., Brintjes, R., Simpson, S.D., Radford, A.N., Breithaupt, T., Elliott,  
992 M., 2016. Exposure of benthic invertebrates to sediment vibration: from laboratory experiments to  
993 outdoor simulated pile-driving, *Proceedings of Meetings on Acoustics 4ENAL*. Acoustical Society of  
994 America, p. 010029.
- 995 Sand, O., Bleckmann, H., 2008. Orientation to auditory and lateral line stimuli, *Fish bioacoustics*.  
996 Springer, pp. 183-231.
- 997 Santulli, A., Modica, A., Messina, C., Ceffa, L., Curatolo, A., Rivas, G., Fabi, G., D'amelio, V., 1999.  
998 Biochemical responses of European sea bass (*Dicentrarchus labrax* L.) to the stress induced by off  
999 shore experimental seismic prospecting. *Marine Pollution Bulletin* 38, 1105-1114.
- 1000 Sarà, G., Dean, J., d'Amato, D., Buscaino, G., Oliveri, A., Genovese, S., Ferro, S., Buffa, G., Martire, M.L,  
1001 Mazzola, S., 2007. Effect of boat noise on the behaviour of bluefin tuna *Thunnus thynnus* in the  
1002 Mediterranean Sea. *Marine Ecology Progress Series* 331, 243-253.
- 1003 Scholik, A.R., Yan, H.Y., 2002. Effects of noise on auditory sensitivity of fishes. *Bioacoustics* 12, 186-  
1004 188.
- 1005 Schuijf, A., 1975. Directional hearing of cod (*Gadus morhua*) under approximate free field conditions.  
1006 *Journal of Comparative Physiology* 98, 307-332.
- 1007 Schuijf, A., 1976. The phase model of directional hearing in fish. *Sound reception in fish*, 63-86.
- 1008 Schuijf, A., Buwalda, R., 1975. On the mechanism of directional hearing in cod (*Gadus morhua* L.).  
1009 *Journal of Comparative Physiology* 98, 333-343.
- 1010 Seda, J., Petrusek, A., 2011. *Daphnia* as a model organism in limnology and aquatic biology:  
1011 introductory remarks. *Journal of Limnology* 70, 337-344.
- 1012 Shafiei Sabet, S., Karnagh, S.A., Azbari, F.Z., 2019. Experimental test of sound and light exposure on  
1013 water flea swimming behaviour, *Proceedings of Meetings on Acoustics 5ENAL*. Acoustical Society of  
1014 America, p. 010015.
- 1015 Shafiei Sabet, S., Neo, Y.Y., Slabbekoorn, H., 2015. The effect of temporal variation in sound exposure  
1016 on swimming and foraging behaviour of captive zebrafish. *Animal Behaviour* 107, 49-60.
- 1017 Shafiei Sabet, S., Van Dooren, D., Slabbekoorn, H., 2016a. Son et lumière: Sound and light effects on  
1018 spatial distribution and swimming behavior in captive zebrafish. *Environmental Pollution* 212, 480-  
1019 488.

- 1020 Shafiei Sabet, S., Wesdorp, K., Campbell, J., Snelderwaard, P., Slabbekoorn, H., 2016b. Behavioural  
1021 responses to sound exposure in captivity by two fish species with different hearing ability. *Animal*  
1022 *Behaviour* 116, 1-11.
- 1023 Shaw, J.R., Pfrender, M.E., Eads, B.D., Klaper, R., Callaghan, A., Sibly, R.M., Colson, I., Jansen, B., Gilbert,  
1024 D., Colbourne, J.K., 2008. *Daphnia* as an emerging model for toxicological genomics. *Advances in*  
1025 *Experimental Biology* 2, 165-328.
- 1026 Simmons, A.M., Narins, P.M., 2018. Effects of anthropogenic noise on amphibians and reptiles, *Effects*  
1027 *of anthropogenic noise on animals*. Springer, pp. 179-208.
- 1028 Simpson, S.D., Purser, J., Radford, A.N., 2015. Anthropogenic noise compromises antipredator  
1029 behaviour in European eels. *Global change biology* 21, 586-593.
- 1030 Sisneros, J.A., Rogers, P.H., 2016. Directional hearing and sound source localization in fishes. *Fish*  
1031 *hearing and bioacoustics*, 121-155.
- 1032 Slabbekoorn, H., Bouton, N., van Opzeeland, I., Coers, A., ten Cate, C., Popper, A.N., 2010. A noisy  
1033 spring: the impact of globally rising underwater sound levels on fish. *Trends in ecology & evolution* 25,  
1034 419-427.
- 1035 Slabbekoorn, H., Ripmeester, E.A.P., 2008. Birdsong and anthropogenic noise: implications and  
1036 applications for conservation. *Molecular ecology* 17, 72-83.
- 1037 Smith, A.L., Parsons, C.H., Lanyon, R.G., Bizley, J.K., Akerman, C.J., Baker, G.E., Dempster, A.C.,  
1038 Thompson, I.D., King, A.J., 2004. An investigation of the role of auditory cortex in sound localization  
1039 using muscimol-releasing Elvax. *European Journal of Neuroscience* 19, 3059-3072.
- 1040 Southall, B.L., Bowles, A.E., Ellison, W.T., Finneran, J.J., Gentry, R.L., Greene Jr, C.R., Kastak, D., Ketten,  
1041 D.R., Miller, J.H., Nachtigall, P.E., 2008. Marine mammal noise-exposure criteria: initial scientific  
1042 recommendations. *Bioacoustics* 17, 273-275.
- 1043 Spence, R., Gerlach, G., Lawrence, C., Smith, C., 2008. The behaviour and ecology of the zebrafish,  
1044 *Danio rerio*. *Biological Reviews* 83, 13-34.
- 1045 Spiga, I., Aldred, N., Caldwell, G.S., 2017. Anthropogenic noise compromises the anti-predator  
1046 behaviour of the European seabass, *Dicentrarchus labrax* (L.). *Marine Pollution Bulletin* 122, 297-305.
- 1047 Staaterman, E., Gallagher, A., Holder, P., Reid, C., Altieri, A., Ogburn, M., Rummer, J., Cooke, S., 2020.  
1048 Exposure to boat noise in the field yields minimal stress response in wild reef fish. *Aquatic Biology* 29,  
1049 93-103.
- 1050 Stollewerk, A., 2010. The water flea *Daphnia*-a 'new' model system for ecology and evolution? *Journal*  
1051 *of biology* 9, 1-4.
- 1052 Thomsen, F., Popper, A.N., Hawkins, A.D., 2021. Sound Impact Studies: A Reply to Risch et al. *Trends*  
1053 *in ecology & evolution* 36, 382-384.
- 1054 Tuomainen, U., Candolin, U., 2011. Behavioural responses to human-induced environmental change.  
1055 *Biological Reviews* 86, 640-657.
- 1056 Tyack, P.L., 2008. Implications for marine mammals of large-scale changes in the marine acoustic  
1057 environment. *Journal of Mammalogy* 89, 549-558.
- 1058 van der Knaap, I., Reubens, J., Thomas, L., Ainslie, M.A., Winter, H.V., Hubert, J., Martin, B.,  
1059 Slabbekoorn, H., 2021. Effects of a seismic survey on movement of free-ranging Atlantic cod. *Current*  
1060 *Biology* 31, 1555-1562. e1554.
- 1061 Villamizar, N., Vera, L.M., Foulkes, N.S., Sánchez-Vázquez, F.J., 2014. Effect of lighting conditions on  
1062 zebrafish growth and development. *Zebrafish* 11, 173-181.
- 1063 Voellmy, I.K., Purser, J., Flynn, D., Kennedy, P., Simpson, S.D., Radford, A.N., 2014a. Acoustic noise  
1064 reduces foraging success in two sympatric fish species via different mechanisms. *Animal Behaviour* 89,  
1065 191-198.
- 1066 Voellmy, I.K., Purser, J., Simpson, S.D., Radford, A.N., 2014b. Increased noise levels have different  
1067 impacts on the anti-predator behaviour of two sympatric fish species. *PloS one* 9, e102946.
- 1068 Voellmy, I.K., Purser, J., Simpson, S.D., Radford, A.N., 2016. Effects of previous acoustic experience on  
1069 behavioral responses to experimental sound stimuli and implications for research, *The effects of noise*  
1070 *on aquatic life II*. Springer, pp. 1191-1196.

- 1071 Wahlberg, M., Westerberg, H., 2005. Hearing in fish and their reactions to sounds from offshore wind  
1072 farms. *Marine Ecology Progress Series* 288, 295-309.
- 1073 Webb, P., 1986. Effect of body form and response threshold on the vulnerability of four species of  
1074 teleost prey attacked by largemouth bass (*Micropterus salmoides*). *Canadian Journal of Fisheries and*  
1075 *Aquatic Sciences* 43, 763-771.
- 1076 Whitfield, T.T., 2002. Zebrafish as a model for hearing and deafness. *Journal of neurobiology* 53, 157-  
1077 171.
- 1078 Wysocki, L.E., Davidson III, J.W., Smith, M.E., Frankel, A.S., Ellison, W.T., Mazik, P.M., Popper, A.N.,  
1079 Bebak, J., 2007. Effects of aquaculture production noise on hearing, growth, and disease resistance of  
1080 rainbow trout *Oncorhynchus mykiss*. *Aquaculture* 272, 687-697.
- 1081 Wysocki, L.E., Dittami, J.P., Ladich, F., 2006. Ship noise and cortisol secretion in European freshwater  
1082 fishes. *Biological conservation* 128, 501-508.
- 1083 Zottoli, S.J., 1977. Correlation of the startle reflex and Mauthner cell auditory responses in  
1084 unrestrained goldfish. *Journal of Experimental Biology* 66, 243-254.
- 1085
